# Supplementary material for: Global burden of ischemic heart disease due to insufficient physical activity in middle-aged and elderly populations from 1990 to 2021 and projections for 2050
Source: Research Square preprint supplement (doi:10.21203/rs.3.rs-6374014/v1), 2025-05-09
Supplement: Supplementary file 1 [file 7e2412c0a94b1e481eb47bc2.xlsx]

## Sheet: excel
Appendix Table
Appendix Table 1 DALYs of IHD due to insufficient physical activity in middle-aged and elderly populations by region from 1990 to 2021: Age-standardized rates and case numbers.
Appendix Table 2 Deaths of IHD due to insufficient physical activity in middle-aged and elderly populations by region from 1990 to 2021: Age-standardized rates and case numbers.
Appendix Table 3 YLDs of IHD due to insufficient physical activity in middle-aged and elderly populations by region from 1990 to 2021: Age-standardized rates and case numbers.
Appendix Table 4 YLLs of IHD due to insufficient physical activity in middle-aged and elderly populations by region from 1990 to 2021: Age-standardized rates and case numbers.
Appendix Table 5 DALYs of IHD due to insufficient physical activity in middle-aged and elderly populations by countries from 1990 to 2021: Age-standardized rates and case numbers.
Appendix Table 6 Deaths of IHD due to insufficient physical activity in middle-aged and elderly populations by countries from 1990 to 2021: Age-standardized rates and case numbers.
Appendix Table 7 YLDs of IHD due to insufficient physical activity in middle-aged and elderly populations by countries from 1990 to 2021: Age-standardized rates and case numbers.
Appendix Table 8 YLLs of IHD due to insufficient physical activity in middle-aged and elderly populations by countries from 1990 to 2021: Age-standardized rates and case numbers.
Appendix Table 1 DALYs of IHD due to insufficient physical activity in middle-aged and elderly populations by region from 1990 to 2021: Age-standardized rates and case numbers.
	Rate Per 100 000(95%UI)
DALYs	1990		2021
location name	Num 95%UI	ASR 95%UI	Num 95%UI	ASR 95%UI	EAPC 95%CI
Advanced Health System	1071573 (473761-1698847)	66.36 (29.24-105.49)	930221 (392975-1461926)	29.4 (12.57-45.87)	-2.04 (-2.68--1.39)
Africa	203973 (94057-306820)	77.19 (35.46-117.7)	381233 (171620-583931)	64.75 (28.77-101.78)	-0.66 (-1.85-0.54)
African Region	63044 (28094-96649)	33.28 (14.43-52.65)	133328 (57051-208310)	31.81 (13.33-50.84)	-0.39 (-1.78-1.01)
America	274396 (117153-462951)	46.67 (19.91-79.72)	325047 (128098-524185)	23.75 (9.44-38.26)	-1.61 (-1.9--1.31)
Andean Latin America	3084 (1248-5264)	16.64 (6.57-28.91)	5887 (2414-10084)	10.32 (4.17-18.01)	-0.78 (-1.45--0.1)
Asia	936775 (421668-1442597)	53.82 (23.76-84.4)	2496403 (1135162-3900979)	52.71 (23.73-83.42)	1.01 (0.5-1.51)
Australasia	18602 (7830-31715)	80.87 (33.59-136.95)	12194 (5240-21528)	20.68 (9.38-35.7)	-3.84 (-4.41--3.26)
Basic Health System	663309 (302042-1010594)	54.49 (24.05-84.81)	1760183 (809498-2769976)	51.85 (23.87-82.44)	1.11 (0.59-1.64)
Caribbean	15037 (6520-23983)	62.15 (26.78-100.22)	20214 (8639-33302)	37.19 (15.87-61.15)	-0.9 (-1.19--0.6)
Central Africa	6838 (2844-11683)	29.25 (11.82-50.71)	14645 (6062-24901)	28.25 (11.59-50.57)	-0.55 (-2.07-0.99)
Central Asia	30865 (13059-49930)	75.96 (31.92-123.82)	38312 (17056-63702)	59.7 (25.87-100.64)	-1 (-1.67--0.32)
Central Europe	125283 (55704-195629)	92.52 (40.73-145.49)	120578 (53787-195573)	50.34 (22.39-81.35)	-1.14 (-1.71--0.56)
Central Latin America	20991 (8785-32970)	27.98 (11.39-44.2)	53740 (24828-84850)	22.13 (10.14-35.12)	0.35 (-0.4-1.11)
Central Sub-Saharan Africa	6244 (2678-10697)	36.04 (14.97-62.37)	13102 (5248-22635)	31.88 (13.11-57.36)	-0.77 (-2.37-0.85)
Commonwealth High Income	219485 (93422-354613)	142.07 (61.17-226.81)	94922 (40147-152165)	32.67 (13.99-51.61)	-4.52 (-5.19--3.85)
Commonwealth Low Income	16154 (7167-28176)	19.45 (8.68-33.5)	42635 (17585-71401)	19.96 (8.07-34.09)	1.03 (-0.17-2.24)
Commonwealth Middle Income	395833 (176062-620872)	69.56 (30-110.36)	1008345 (468284-1616230)	71.93 (32.32-116.46)	0.56 (-0.25-1.39)
East Asia	245882 (107921-409558)	40.23 (16.51-69.7)	845018 (373908-1496115)	45.02 (19.43-81.07)	2.28 (1.7-2.85)
East Asia & Pacific - WB	446405 (196817-699530)	41.2 (17.43-64.67)	1308339 (596643-2113531)	41.49 (18.72-67.36)	1.57 (1.16-1.99)
Eastern Africa	69612 (32143-108511)	93.54 (42.46-147.42)	107446 (46385-179812)	61.84 (27.65-103.59)	-1.52 (-2.69--0.33)
Eastern Europe	234988 (101640-374032)	96.57 (41.48-157.04)	276338 (113491-458484)	75.63 (30.71-124.85)	-0.32 (-0.83-0.2)
Eastern Mediterranean Region	264163 (123080-396999)	151.87 (69.73-231.4)	518377 (245503-802699)	121.28 (56.42-190.33)	-0.53 (-1.48-0.42)
Eastern Sub-Saharan Africa	5743 (2491-9328)	8.41 (3.62-13.68)	13197 (5885-21432)	8.62 (3.73-14.12)	-0.02 (-1.47-1.45)
Europe	827525 (361989-1296640)	80.8 (35.02-126.58)	689898 (287152-1105550)	38.34 (16.03-61.16)	-1.83 (-2.51--1.15)
Europe & Central Asia - WB	844626 (368696-1322111)	80.43 (34.79-126.05)	714294 (297216-1145085)	38.81 (16.18-61.96)	-1.83 (-2.44--1.21)
European Region	848559 (370304-1328093)	80.29 (34.72-125.85)	717657 (298457-1149762)	38.62 (16.1-61.65)	-1.84 (-2.45--1.22)
High-income Asia Pacific	47344 (19353-78732)	25.29 (10.29-43.52)	50724 (20068-88419)	10.09 (4.31-16.84)	-1.49 (-2.31--0.66)
High-income North America	173285 (68487-317707)	47.11 (18.9-85.82)	149385 (56150-253432)	21.15 (7.96-35.42)	-2.39 (-3.03--1.73)
Latin America & Caribbean - WB	102985 (47118-160769)	43.03 (19.05-68.06)	176902 (77497-279940)	25.48 (11.16-40.49)	-0.61 (-1.13--0.1)
Limited Health System	486669 (221412-743306)	66.31 (29.3-102.9)	1168332 (547564-1859111)	65.43 (29.55-104.86)	0.36 (-0.54-1.25)
Middle East & North Africa - WB	176010 (79658-264928)	158.03 (71.45-243)	362368 (163851-557346)	115.15 (51.75-181.34)	-0.47 (-1.37-0.44)
Minimal Health System	23093 (9748-37544)	42.8 (17.86-70.95)	35267 (15760-56480)	32.42 (14.08-52.46)	-1.49 (-2.89--0.08)
North Africa and Middle East	282104 (128630-428950)	178.23 (79.81-272.61)	533296 (245473-820719)	125.43 (57.53-196.35)	-0.64 (-1.45-0.19)
North America	173311 (68503-317745)	47.11 (18.91-85.82)	149402 (56154-253460)	21.15 (7.96-35.42)	-2.39 (-3.03--1.73)
Northern Africa	92602 (40946-140989)	168.71 (73.77-260.15)	185773 (83413-300076)	137.71 (60.74-224.48)	-0.11 (-0.98-0.76)
Oceania	2268 (1016-3769)	72.65 (31.75-118.04)	5170 (2253-8567)	63.31 (26.69-104.98)	-0.12 (-1.02-0.78)
Region of the Americas	274396 (117153-462951)	46.67 (19.91-79.72)	325047 (128098-524185)	23.75 (9.44-38.26)	-1.61 (-1.9--1.31)
South-East Asia Region	466178 (206981-732271)	74.34 (31.81-118.45)	1248858 (569612-1961996)	75.72 (33.63-120.24)	0.83 (0.1-1.57)
South Asia	372676 (165496-583198)	70.88 (30.16-112.4)	965153 (445805-1558795)	72.25 (32.29-118.7)	0.68 (-0.11-1.47)
South Asia - WB	388163 (173370-605096)	71.43 (30.45-112.98)	984450 (457014-1588953)	71.7 (32.1-117.21)	0.61 (-0.17-1.4)
Southeast Asia	134091 (60513-213565)	59.28 (25.62-95.9)	398853 (180020-638098)	66.37 (29.53-105.81)	1.26 (0.56-1.96)
Southern Africa	15272 (6896-24343)	39.46 (17.36-64.89)	33167 (15145-51924)	41.79 (18.48-67.04)	0.03 (-1.16-1.24)
Southern Latin America	8840 (3766-14746)	20.91 (8.96-35.88)	6985 (2810-12345)	7.77 (3.13-13.53)	-2.18 (-2.44--1.92)
Southern Sub-Saharan Africa	13762 (6124-22021)	54.38 (23.79-89.93)	28798 (13142-45028)	56.88 (25.31-90.88)	0.38 (-0.48-1.26)
Sub-Saharan Africa - WB	112119 (52402-172693)	51.77 (23.21-80.84)	196715 (91077-303418)	41.25 (18.48-65.21)	-1.02 (-2.24-0.21)
Tropical Latin America	55585 (25039-88803)	70.71 (30.43-113.45)	90789 (36683-149750)	36.03 (14.73-59.42)	-0.83 (-1.35--0.31)
Western Africa	19649 (8752-31964)	28.54 (12.47-48.03)	40202 (17120-63365)	26.89 (11.01-43.76)	-0.46 (-1.84-0.94)
Western Europe	429799 (186149-689488)	71.61 (31.25-114.46)	225141 (94691-362531)	20.21 (8.64-31.97)	-3.59 (-4.5--2.67)
Western Pacific Region	322667 (139598-515665)	35.74 (14.88-58.63)	943562 (419337-1637646)	34.78 (15.42-60.85)	1.66 (1.24-2.08)
Western Sub-Saharan Africa	21540 (9576-34907)	28.18 (12.19-46.52)	45069 (19173-71959)	26.93 (10.74-43.63)	-0.42 (-1.79-0.98)
World Bank High Income	804808 (344209-1282029)	61.82 (26.7-98.46)	587184 (248993-944425)	22.3 (9.7-35.45)	-2.75 (-3.46--2.03)
World Bank Low Income	115844 (52378-181761)	81.42 (36.25-128.08)	194881 (89553-309308)	61.56 (28.84-98.01)	-1.13 (-2.3-0.06)
World Bank Lower Middle Income	697850 (316874-1077683)	75.71 (33.7-118.2)	1703875 (777543-2635332)	76.65 (34.03-120.41)	0.51 (-0.32-1.35)
World Bank Upper Middle Income	626132 (277753-958822)	54.55 (23.58-85.26)	1408051 (641473-2306212)	43.92 (20.02-72.82)	0.59 (0.14-1.05)
Abbreviations:EAPC: Estimated Annual Percentage Change; UI: Uncertainty Interval; CI: Confidence Interval
Appendix Table 2 Deaths of IHD due to insufficient physical activity in middle-aged and elderly populations by region from 1990 to 2021: Age-standardized rates and case numbers.
	Rate Per 100 000(95%UI)
Deaths	1990		2021
location name	Num 95%UI	ASR 95%UI	Num 95%UI	ASR 95%UI	EAPC 95%CI
Advanced Health System	70160 (30545-113493)	4.5 (1.96-7.29)	66961 (27861-107556)	1.94 (0.81-3.1)	-1.89 (-2.58--1.2)
Africa	8611 (3949-13220)	4.05 (1.8-6.42)	17233 (7651-27107)	3.64 (1.57-5.86)	-0.39 (-1.86-1.11)
African Region	2976 (1280-4732)	1.94 (0.81-3.16)	6699 (2812-10791)	1.97 (0.81-3.26)	-0.17 (-1.82-1.5)
America	17789 (7051-32082)	3.14 (1.23-5.76)	20880 (7889-34825)	1.49 (0.57-2.48)	-1.75 (-2.03--1.47)
Andean Latin America	178 (70-328)	1.05 (0.42-2)	356 (135-667)	0.64 (0.24-1.22)	-0.67 (-1.43-0.09)
Asia	44994 (19629-70986)	3.15 (1.36-5.04)	143005 (63487-229195)	3.25 (1.45-5.28)	1.48 (0.79-2.18)
Australasia	1181 (466-2067)	5.35 (2.07-9.46)	918 (363-1751)	1.43 (0.58-2.68)	-3.51 (-4.13--2.88)
Basic Health System	33725 (14675-52673)	3.4 (1.45-5.36)	105580 (47360-171107)	3.4 (1.5-5.68)	1.54 (0.82-2.26)
Caribbean	850 (357-1415)	3.81 (1.58-6.4)	1159 (472-1953)	2.1 (0.86-3.54)	-1.04 (-1.37--0.72)
Central Africa	320 (132-558)	1.66 (0.65-2.88)	709 (290-1261)	1.68 (0.68-3.02)	-0.4 (-2.16-1.39)
Central Asia	1988 (825-3336)	5.26 (2.19-8.89)	2480 (1065-4271)	4.24 (1.8-7.33)	-0.82 (-1.6--0.04)
Central Europe	7848 (3330-12566)	6.33 (2.7-10.31)	8900 (3960-14799)	3.65 (1.62-6.06)	-0.71 (-1.26--0.16)
Central Latin America	1097 (438-1749)	1.67 (0.65-2.7)	3104 (1347-5262)	1.33 (0.57-2.28)	0.54 (-0.3-1.39)
Central Sub-Saharan Africa	288 (121-507)	2.1 (0.82-3.71)	636 (259-1139)	1.92 (0.78-3.65)	-0.63 (-2.49-1.27)
Commonwealth High Income	13307 (5501-21934)	8.58 (3.57-14.05)	6542 (2734-10483)	2.07 (0.86-3.29)	-4.22 (-4.95--3.48)
Commonwealth Low Income	702 (307-1202)	0.96 (0.4-1.66)	2040 (825-3446)	1.08 (0.43-1.86)	1.27 (-0.12-2.68)
Commonwealth Middle Income	17254 (7414-27308)	3.65 (1.53-5.86)	51399 (22347-84603)	4.19 (1.75-6.85)	1.13 (0.1-2.17)
East Asia	13227 (5421-23149)	2.81 (1.09-5.22)	58738 (24292-107267)	3.42 (1.39-6.37)	2.89 (2.08-3.71)
East Asia & Pacific - WB	23379 (9824-37297)	2.63 (1.08-4.32)	83007 (36327-143055)	2.75 (1.19-4.76)	2 (1.44-2.57)
Eastern Africa	2438 (1111-3860)	3.96 (1.76-6.51)	3840 (1714-6429)	2.74 (1.19-4.65)	-1.41 (-2.86-0.05)
Eastern Europe	15659 (6745-25886)	7.09 (2.99-12.1)	20051 (8171-34189)	5.49 (2.22-9.32)	-0.12 (-0.58-0.34)
Eastern Mediterranean Region	11045 (5028-16941)	7.63 (3.38-11.96)	22645 (10479-35638)	6.47 (2.93-10.18)	-0.3 (-1.49-0.9)
Eastern Sub-Saharan Africa	239 (101-392)	0.43 (0.18-0.71)	573 (245-946)	0.46 (0.19-0.78)	0.13 (-1.58-1.87)
Europe	54013 (23376-87037)	5.48 (2.38-8.86)	50793 (20947-81730)	2.65 (1.09-4.23)	-1.56 (-2.26--0.85)
Europe & Central Asia - WB	55087 (23811-88526)	5.46 (2.37-8.84)	52315 (21488-84004)	2.68 (1.1-4.27)	-1.56 (-2.2--0.92)
European Region	55331 (23904-88913)	5.45 (2.36-8.81)	52556 (21574-84422)	2.67 (1.1-4.25)	-1.57 (-2.21--0.94)
High-income Asia Pacific	2684 (1032-4905)	1.57 (0.58-2.97)	3612 (1294-6814)	0.57 (0.22-1.02)	-1.25 (-2.22--0.27)
High-income North America	12333 (4521-23939)	3.33 (1.24-6.51)	10983 (4059-20297)	1.47 (0.55-2.67)	-2.35 (-3.04--1.67)
Latin America & Caribbean - WB	5576 (2367-8860)	2.62 (1.08-4.21)	9984 (4251-16133)	1.47 (0.62-2.37)	-0.59 (-1.18-0)
Limited Health System	20642 (9043-31933)	3.4 (1.43-5.38)	57901 (25488-93788)	3.74 (1.57-6.08)	0.92 (-0.2-2.05)
Middle East & North Africa - WB	7905 (3536-12305)	8.71 (3.77-13.73)	17285 (7709-27309)	6.54 (2.86-10.55)	-0.27 (-1.41-0.89)
Minimal Health System	1004 (418-1671)	2.25 (0.92-3.8)	1564 (678-2533)	1.8 (0.76-2.95)	-1.29 (-2.93-0.38)
North Africa and Middle East	12203 (5414-18711)	9.37 (4.04-14.61)	25011 (11332-39502)	6.99 (3.09-11.1)	-0.31 (-1.36-0.75)
North America	12334 (4522-23941)	3.33 (1.24-6.51)	10984 (4059-20300)	1.47 (0.55-2.67)	-2.35 (-3.04--1.67)
Northern Africa	4180 (1828-6480)	9.53 (4.13-15.42)	9099 (4029-15033)	8.19 (3.49-13.63)	0.2 (-0.94-1.34)
Oceania	77 (34-125)	3.17 (1.37-5.22)	179 (75-296)	2.74 (1.14-4.58)	-0.11 (-1.31-1.1)
Region of the Americas	17789 (7051-32082)	3.14 (1.23-5.76)	20880 (7889-34825)	1.49 (0.57-2.48)	-1.75 (-2.03--1.47)
South-East Asia Region	20507 (8722-32780)	3.96 (1.66-6.46)	64026 (27738-102434)	4.37 (1.87-7.08)	1.33 (0.39-2.29)
South Asia	16080 (6804-25499)	3.67 (1.53-5.91)	49336 (21384-81671)	4.19 (1.73-6.92)	1.29 (0.29-2.3)
South Asia - WB	16726 (7060-26470)	3.69 (1.53-5.94)	50140 (21720-82759)	4.14 (1.71-6.83)	1.22 (0.22-2.22)
Southeast Asia	6287 (2679-10209)	3.25 (1.37-5.38)	19741 (8658-31744)	3.71 (1.63-6.02)	1.37 (0.49-2.25)
Southern Africa	711 (308-1191)	2.28 (0.96-3.86)	1627 (712-2617)	2.55 (1.08-4.24)	0.2 (-1.25-1.68)
Southern Latin America	547 (232-1001)	1.4 (0.57-2.65)	472 (176-924)	0.51 (0.19-0.99)	-1.96 (-2.23--1.68)
Southern Sub-Saharan Africa	646 (276-1100)	3 (1.26-5.11)	1431 (631-2306)	3.39 (1.44-5.61)	0.6 (-0.48-1.69)
Sub-Saharan Africa - WB	4465 (1983-7001)	2.53 (1.07-4.02)	8192 (3640-13043)	2.16 (0.93-3.44)	-0.83 (-2.33-0.7)
Tropical Latin America	2935 (1240-4767)	4.34 (1.81-7.33)	4934 (1920-8227)	2.02 (0.78-3.38)	-0.87 (-1.49--0.24)
Western Africa	963 (414-1636)	1.66 (0.7-2.98)	1958 (796-3205)	1.59 (0.61-2.7)	-0.42 (-2.03-1.2)
Western Europe	28333 (12271-46412)	4.72 (2.05-7.74)	17452 (7184-28800)	1.4 (0.58-2.28)	-3.24 (-4.22--2.24)
Western Pacific Region	17586 (7204-29224)	2.38 (0.95-4.07)	64789 (27461-115427)	2.47 (1.04-4.43)	2.2 (1.64-2.76)
Western Sub-Saharan Africa	1050 (451-1759)	1.62 (0.68-2.86)	2184 (867-3570)	1.58 (0.61-2.69)	-0.38 (-1.98-1.25)
World Bank High Income	52800 (22486-85770)	4.12 (1.76-6.74)	42561 (17134-69048)	1.44 (0.6-2.32)	-2.62 (-3.41--1.83)
World Bank Low Income	4518 (1991-7162)	4.01 (1.7-6.47)	7991 (3707-12680)	3.15 (1.42-5.03)	-0.94 (-2.4-0.55)
World Bank Lower Middle Income	32132 (14101-50482)	4.19 (1.81-6.74)	87538 (38213-138666)	4.52 (1.95-7.25)	0.88 (-0.17-1.93)
World Bank Upper Middle Income	36081 (15323-56530)	3.79 (1.59-6.09)	93915 (41858-158268)	3.12 (1.37-5.29)	0.94 (0.32-1.55)
Abbreviations:EAPC: Estimated Annual Percentage Change; UI: Uncertainty Interval; CI: Confidence Interval
Appendix Table 3 YLDs of IHD due to insufficient physical activity in middle-aged and elderly populations by region from 1990 to 2021: Age-standardized rates and case numbers.
	Rate Per 100 000(95%UI)
YLDs	1990		2021
location name	Num 95%UI	ASR 95%UI	Num 95%UI	ASR 95%UI	EAPC 95%CI
Advanced Health System	18440 (7948-32332)	1.12 (0.48-1.96)	27539 (11828-48465)	0.89 (0.38-1.56)	-0.23 (-0.87-0.42)
Africa	2134 (909-3806)	0.84 (0.35-1.51)	5662 (2408-9687)	0.94 (0.4-1.61)	0.37 (-0.85-1.6)
African Region	1038 (420-1851)	0.55 (0.22-0.99)	2723 (1126-4709)	0.61 (0.25-1.06)	0.3 (-1.05-1.67)
America	4254 (1787-7556)	0.71 (0.3-1.26)	9659 (3780-16637)	0.71 (0.28-1.21)	0.5 (0.23-0.77)
Andean Latin America	72 (28-139)	0.39 (0.15-0.74)	257 (100-467)	0.45 (0.17-0.83)	1.52 (0.88-2.16)
Asia	15527 (6743-26492)	0.91 (0.39-1.55)	50412 (21109-88125)	1.05 (0.44-1.84)	1.53 (1.02-2.05)
Australasia	328 (134-647)	1.4 (0.57-2.73)	577 (241-1050)	1 (0.41-1.81)	-0.94 (-1.51--0.36)
Basic Health System	11431 (4757-20181)	0.92 (0.39-1.64)	38201 (16404-66605)	1.08 (0.46-1.88)	1.74 (1.24-2.24)
Caribbean	253 (103-442)	1.02 (0.42-1.81)	517 (217-919)	0.95 (0.4-1.7)	0.47 (0.21-0.73)
Central Africa	79 (29-148)	0.36 (0.13-0.69)	201 (81-347)	0.39 (0.17-0.71)	0.03 (-1.54-1.62)
Central Asia	371 (150-656)	0.9 (0.36-1.59)	575 (238-1026)	0.85 (0.36-1.54)	0.04 (-0.6-0.68)
Central Europe	2207 (906-3833)	1.55 (0.64-2.71)	3571 (1506-6330)	1.5 (0.63-2.64)	0.9 (0.28-1.52)
Central Latin America	392 (154-687)	0.52 (0.2-0.92)	1421 (565-2476)	0.58 (0.23-1.02)	1.68 (0.97-2.41)
Central Sub-Saharan Africa	67 (25-126)	0.42 (0.16-0.83)	167 (64-294)	0.42 (0.17-0.76)	-0.2 (-1.88-1.51)
Commonwealth High Income	3612 (1456-6299)	2.3 (0.95-4.02)	3753 (1537-6658)	1.31 (0.54-2.29)	-1.73 (-2.39--1.05)
Commonwealth Low Income	303 (124-550)	0.39 (0.16-0.71)	1115 (461-2044)	0.52 (0.21-0.96)	1.76 (0.54-2.99)
Commonwealth Middle Income	5410 (2224-9797)	1.05 (0.43-1.86)	17017 (6902-30101)	1.25 (0.51-2.24)	1.22 (0.31-2.13)
East Asia	5345 (2116-9885)	0.78 (0.3-1.43)	20536 (8460-37521)	0.99 (0.42-1.84)	2.38 (1.94-2.82)
East Asia & Pacific - WB	9281 (3895-16524)	0.82 (0.34-1.46)	30207 (12534-53324)	0.93 (0.39-1.63)	1.72 (1.34-2.09)
Eastern Africa	571 (241-947)	0.82 (0.35-1.41)	1520 (665-2631)	0.91 (0.38-1.56)	0.35 (-0.92-1.65)
Eastern Europe	3051 (1213-5286)	1.19 (0.47-2.06)	4479 (1773-7753)	1.22 (0.49-2.13)	0.78 (0.29-1.27)
Eastern Mediterranean Region	2575 (1085-4541)	1.53 (0.64-2.69)	7564 (3209-12826)	1.76 (0.74-2.99)	0.8 (-0.18-1.8)
Eastern Sub-Saharan Africa	139 (53-245)	0.21 (0.08-0.38)	384 (156-688)	0.25 (0.1-0.44)	0.58 (-0.89-2.07)
Europe	14159 (5954-24715)	1.35 (0.57-2.37)	19506 (8568-33768)	1.12 (0.49-1.95)	-0.08 (-0.75-0.61)
Europe & Central Asia - WB	14369 (6063-25095)	1.34 (0.57-2.35)	19842 (8717-34363)	1.11 (0.48-1.93)	-0.1 (-0.72-0.52)
European Region	14434 (6091-25211)	1.34 (0.57-2.34)	19976 (8776-34627)	1.11 (0.48-1.93)	-0.11 (-0.72-0.51)
High-income Asia Pacific	1304 (524-2333)	0.66 (0.26-1.19)	2210 (843-4011)	0.48 (0.19-0.85)	-0.09 (-0.89-0.72)
High-income North America	2467 (916-4655)	0.66 (0.25-1.24)	4174 (1581-7541)	0.59 (0.23-1.05)	-0.34 (-1-0.32)
Latin America & Caribbean - WB	1828 (759-3361)	0.76 (0.32-1.39)	5557 (2192-9837)	0.8 (0.32-1.41)	1.24 (0.74-1.75)
Limited Health System	6032 (2526-10821)	0.91 (0.38-1.59)	19135 (7793-33959)	1.1 (0.45-1.97)	1.24 (0.25-2.23)
Middle East & North Africa - WB	1769 (761-3168)	1.59 (0.69-2.86)	5802 (2482-9914)	1.78 (0.75-3.06)	1.04 (0.14-1.94)
Minimal Health System	212 (86-378)	0.42 (0.17-0.76)	440 (181-749)	0.42 (0.17-0.74)	-0.4 (-1.87-1.1)
North Africa and Middle East	2754 (1196-4818)	1.78 (0.76-3.13)	8553 (3676-14727)	1.97 (0.84-3.38)	0.95 (0.1-1.8)
North America	2467 (916-4656)	0.66 (0.25-1.24)	4176 (1582-7543)	0.59 (0.23-1.05)	-0.34 (-1-0.32)
Northern Africa	836 (349-1512)	1.52 (0.65-2.79)	2389 (1021-4099)	1.69 (0.71-2.93)	0.83 (-0.02-1.69)
Oceania	19 (8-34)	0.7 (0.29-1.24)	50 (20-90)	0.71 (0.28-1.25)	0.36 (-0.73-1.47)
Region of the Americas	4254 (1787-7556)	0.71 (0.3-1.26)	9659 (3780-16637)	0.71 (0.28-1.21)	0.5 (0.23-0.77)
South-East Asia Region	6580 (2725-11703)	1.17 (0.49-2.04)	21201 (8412-37103)	1.32 (0.53-2.33)	1.34 (0.52-2.16)
South Asia	4970 (2046-9040)	1.05 (0.43-1.88)	16194 (6516-28828)	1.25 (0.51-2.25)	1.37 (0.48-2.26)
South Asia - WB	5078 (2096-9224)	1.04 (0.42-1.85)	16402 (6613-29215)	1.23 (0.5-2.21)	1.35 (0.47-2.23)
Southeast Asia	2310 (943-4002)	1.09 (0.44-1.89)	6921 (2859-12054)	1.19 (0.5-2.06)	1.22 (0.48-1.97)
Southern Africa	403 (167-716)	1.09 (0.44-1.95)	834 (345-1448)	1.03 (0.44-1.87)	-0.22 (-1.42-0.99)
Southern Latin America	99 (41-181)	0.23 (0.09-0.43)	161 (60-292)	0.18 (0.07-0.33)	-0.48 (-0.71--0.25)
Southern Sub-Saharan Africa	370 (152-659)	1.52 (0.61-2.75)	748 (304-1309)	1.45 (0.61-2.64)	0.17 (-0.72-1.06)
Sub-Saharan Africa - WB	1306 (540-2319)	0.65 (0.27-1.15)	3297 (1393-5661)	0.71 (0.29-1.22)	0.17 (-1.13-1.49)
Tropical Latin America	1021 (403-1910)	1.3 (0.52-2.39)	3220 (1174-5908)	1.29 (0.47-2.35)	1.23 (0.69-1.76)
Western Africa	245 (93-450)	0.34 (0.13-0.61)	717 (285-1252)	0.45 (0.17-0.79)	0.82 (-0.52-2.17)
Western Europe	8363 (3544-14905)	1.38 (0.59-2.45)	9899 (4311-17924)	0.95 (0.41-1.7)	-0.92 (-1.82--0.02)
Western Pacific Region	7071 (2923-12802)	0.72 (0.3-1.3)	23723 (9806-42489)	0.84 (0.35-1.52)	1.87 (1.51-2.23)
Western Sub-Saharan Africa	271 (104-494)	0.34 (0.13-0.62)	799 (318-1374)	0.45 (0.17-0.8)	0.79 (-0.54-2.15)
World Bank High Income	14851 (6409-26295)	1.12 (0.49-1.99)	21436 (9233-37981)	0.84 (0.35-1.47)	-0.53 (-1.24-0.18)
World Bank Low Income	963 (409-1615)	0.72 (0.3-1.24)	2483 (1082-4244)	0.8 (0.35-1.37)	0.37 (-0.87-1.62)
World Bank Lower Middle Income	9229 (3915-16308)	1.05 (0.44-1.86)	27512 (11158-49454)	1.25 (0.51-2.23)	1.16 (0.3-2.04)
World Bank Upper Middle Income	11073 (4517-19531)	0.9 (0.38-1.61)	33885 (14266-59401)	1.01 (0.43-1.76)	1.65 (1.25-2.05)
Abbreviations:EAPC: Estimated Annual Percentage Change; UI: Uncertainty Interval; CI: Confidence Interval
Appendix Table 4 YLLs of IHD due to insufficient physical activity in middle-aged and elderly populations by region from 1990 to 2021: Age-standardized rates and case numbers.
	Rate Per 100 000(95%UI)
YLLs	1990		2021
location name	Num 95%UI	ASR 95%UI	Num 95%UI	ASR 95%UI	EAPC 95%CI
Advanced Health System	1053132 (463628-1669350)	65.24 (28.62-103.58)	902682 (380129-1420394)	28.51 (12.15-44.62)	-2.08 (-2.72--1.44)
Africa	201839 (93216-303928)	76.35 (35.13-116.49)	375571 (169438-576340)	63.8 (28.46-100.18)	-0.68 (-1.87-0.53)
African Region	62006 (27601-95316)	32.73 (14.17-51.75)	130605 (55834-204345)	31.2 (13.14-49.98)	-0.41 (-1.79-1)
America	270142 (115537-456242)	45.96 (19.6-78.49)	315389 (124706-510067)	23.04 (9.19-37.23)	-1.66 (-1.95--1.36)
Andean Latin America	3011 (1215-5139)	16.24 (6.44-28.2)	5630 (2290-9651)	9.87 (3.96-17.17)	-0.86 (-1.54--0.17)
Asia	921249 (414785-1413148)	52.91 (23.36-83.09)	2445991 (1112571-3816671)	51.67 (23.25-81.75)	1 (0.49-1.5)
Australasia	18274 (7698-30986)	79.48 (33.02-134.33)	11616 (4942-20574)	19.67 (8.85-33.98)	-3.93 (-4.5--3.35)
Basic Health System	651877 (296404-990691)	53.57 (23.54-83.46)	1721982 (791801-2705020)	50.77 (23.4-80.56)	1.1 (0.58-1.63)
Caribbean	14784 (6413-23596)	61.13 (26.35-98.47)	19697 (8380-32556)	36.24 (15.39-59.78)	-0.93 (-1.22--0.63)
Central Africa	6759 (2803-11536)	28.89 (11.65-50.01)	14443 (5964-24597)	27.86 (11.39-49.86)	-0.56 (-2.07-0.98)
Central Asia	30494 (12885-49362)	75.06 (31.54-122.44)	37737 (16734-62837)	58.85 (25.45-99.28)	-1.01 (-1.68--0.33)
Central Europe	123076 (54716-192089)	90.97 (40-143.42)	117008 (52019-189824)	48.83 (21.65-78.93)	-1.18 (-1.76--0.6)
Central Latin America	20598 (8620-32447)	27.46 (11.15-43.5)	52319 (24060-82724)	21.55 (9.82-34.28)	0.32 (-0.44-1.08)
Central Sub-Saharan Africa	6176 (2643-10574)	35.62 (14.8-61.63)	12935 (5174-22403)	31.46 (12.91-56.69)	-0.78 (-2.38-0.84)
Commonwealth High Income	215874 (91673-348001)	139.76 (60.1-223.33)	91168 (38507-145932)	31.36 (13.42-49.41)	-4.59 (-5.26--3.92)
Commonwealth Low Income	15851 (6994-27602)	19.07 (8.44-32.93)	41520 (17102-70079)	19.44 (7.87-33.27)	1.01 (-0.18-2.22)
Commonwealth Middle Income	390424 (173723-611179)	68.51 (29.62-108.76)	991328 (458928-1593428)	70.68 (31.66-114.48)	0.55 (-0.26-1.37)
East Asia	240538 (105350-399803)	39.45 (16.14-68.26)	824482 (364279-1467022)	44.02 (18.99-79.44)	2.27 (1.7-2.85)
East Asia & Pacific - WB	437124 (191692-685677)	40.38 (17.03-63.28)	1278132 (582791-2064604)	40.56 (18.29-65.87)	1.57 (1.16-1.98)
Eastern Africa	69042 (31931-107792)	92.72 (42.15-146.46)	105926 (45451-177539)	60.93 (27.07-102.27)	-1.54 (-2.71--0.35)
Eastern Europe	231937 (100270-369639)	95.38 (41.04-155.44)	271859 (111646-450856)	74.41 (30.23-122.92)	-0.33 (-0.85-0.18)
Eastern Mediterranean Region	261588 (122006-393577)	150.33 (69.18-229.45)	510813 (242123-792470)	119.52 (55.62-187.72)	-0.55 (-1.49-0.41)
Eastern Sub-Saharan Africa	5604 (2401-9108)	8.2 (3.51-13.41)	12813 (5709-20794)	8.37 (3.61-13.74)	-0.04 (-1.49-1.43)
Europe	813366 (356304-1276205)	79.44 (34.48-124.8)	670392 (277120-1072999)	37.22 (15.43-59.43)	-1.87 (-2.54--1.19)
Europe & Central Asia - WB	830256 (362923-1301375)	79.09 (34.26-124.17)	694452 (286857-1111911)	37.7 (15.6-60.18)	-1.86 (-2.48--1.24)
European Region	834125 (364507-1307266)	78.95 (34.19-123.93)	697681 (288028-1116384)	37.52 (15.51-59.91)	-1.88 (-2.49--1.26)
High-income Asia Pacific	46040 (18741-76723)	24.63 (9.97-42.53)	48514 (19340-84794)	9.61 (4.1-15.98)	-1.54 (-2.37--0.71)
High-income North America	170818 (67450-312726)	46.45 (18.66-84.71)	145210 (54582-246365)	20.56 (7.73-34.31)	-2.43 (-3.07--1.77)
Latin America & Caribbean - WB	101157 (46432-158256)	42.27 (18.77-66.79)	171345 (74922-271955)	24.68 (10.79-39.25)	-0.66 (-1.17--0.14)
Limited Health System	480637 (218550-734293)	65.4 (28.96-101.5)	1149197 (537618-1834404)	64.32 (29.03-103.35)	0.34 (-0.55-1.24)
Middle East & North Africa - WB	174241 (78747-262040)	156.44 (70.74-240.61)	356567 (161422-549043)	113.37 (51.04-178.2)	-0.48 (-1.39-0.42)
Minimal Health System	22880 (9661-37300)	42.38 (17.67-70.2)	34828 (15557-56003)	31.99 (13.87-51.73)	-1.51 (-2.9--0.09)
North Africa and Middle East	279350 (127214-424564)	176.45 (78.92-269.5)	524743 (241779-808290)	123.46 (56.67-193.12)	-0.66 (-1.47-0.17)
North America	170843 (67466-312764)	46.45 (18.67-84.71)	145226 (54585-246388)	20.56 (7.73-34.31)	-2.43 (-3.07--1.77)
Northern Africa	91766 (40528-139902)	167.19 (73.07-257.75)	183384 (82351-296111)	136.02 (60.16-222.03)	-0.12 (-0.99-0.75)
Oceania	2249 (1008-3746)	71.95 (31.48-117)	5120 (2234-8490)	62.6 (26.42-104.06)	-0.13 (-1.02-0.78)
Region of the Americas	270142 (115537-456242)	45.96 (19.6-78.49)	315389 (124706-510067)	23.04 (9.19-37.23)	-1.66 (-1.95--1.36)
South-East Asia Region	459597 (204418-720750)	73.17 (31.35-116.8)	1227657 (560187-1925043)	74.4 (33.04-117.72)	0.82 (0.09-1.56)
South Asia	367705 (162862-575277)	69.83 (29.69-110.57)	948960 (436989-1535211)	71 (31.64-116.26)	0.67 (-0.12-1.46)
South Asia - WB	383086 (171085-596004)	70.39 (30.01-111.44)	968048 (448070-1566877)	70.47 (31.51-115.1)	0.6 (-0.18-1.38)
Southeast Asia	131781 (59371-210053)	58.19 (25.16-94.36)	391932 (176649-629526)	65.18 (29.04-104.36)	1.26 (0.56-1.96)
Southern Africa	14869 (6724-23733)	38.38 (16.89-62.89)	32333 (14760-50780)	40.76 (18.03-65.56)	0.04 (-1.16-1.24)
Southern Latin America	8741 (3719-14594)	20.68 (8.85-35.57)	6824 (2741-12062)	7.58 (3.05-13.22)	-2.21 (-2.47--1.94)
Southern Sub-Saharan Africa	13392 (5964-21466)	52.86 (23.09-87.58)	28050 (12778-43837)	55.43 (24.69-88.83)	0.39 (-0.48-1.26)
Sub-Saharan Africa - WB	110813 (51868-170818)	51.12 (22.95-79.92)	193418 (89480-298662)	40.54 (18.2-64.22)	-1.04 (-2.26-0.2)
Tropical Latin America	54564 (24612-87152)	69.41 (29.95-111.09)	87568 (35465-144615)	34.74 (14.17-57.44)	-0.89 (-1.41--0.37)
Western Africa	19404 (8604-31521)	28.2 (12.33-47.44)	39484 (16831-62385)	26.44 (10.87-43.1)	-0.48 (-1.86-0.92)
Western Europe	421436 (182491-674850)	70.23 (30.56-112.06)	215242 (90172-346755)	19.27 (8.21-30.43)	-3.67 (-4.58--2.75)
Western Pacific Region	315597 (136139-505140)	35.02 (14.51-57.46)	919839 (408599-1604527)	33.94 (15.04-59.48)	1.65 (1.23-2.07)
Western Sub-Saharan Africa	21269 (9423-34482)	27.84 (12.05-45.93)	44269 (18747-70861)	26.48 (10.6-42.95)	-0.43 (-1.81-0.96)
World Bank High Income	789957 (338431-1259621)	60.69 (26.26-96.57)	565749 (239777-910207)	21.47 (9.34-33.95)	-2.8 (-3.52--2.08)
World Bank Low Income	114881 (51865-180402)	80.71 (35.9-126.97)	192398 (88180-305817)	60.76 (28.38-96.57)	-1.14 (-2.31-0.04)
World Bank Lower Middle Income	688621 (312846-1060820)	74.65 (33.2-116.3)	1676364 (763279-2586356)	75.41 (33.47-118.26)	0.5 (-0.32-1.34)
World Bank Upper Middle Income	615058 (273309-943565)	53.65 (23.21-83.87)	1374166 (625762-2257187)	42.92 (19.56-71.23)	0.57 (0.12-1.03)
Abbreviations:EAPC: Estimated Annual Percentage Change; UI: Uncertainty Interval; CI: Confidence Interval
Appendix Table 5 DALYs of IHD due to insufficient physical activity in middle-aged and elderly populations by region from 1990 to 2021: Age-standardized rates and case numbers.
	Rate Per 100 000(95%UI)
DALYs	1990		2021
location name	Num 95%UI	ASR 95%UI	Num 95%UI	ASR 95%UI	EAPC 95%CI
Countries
Afghanistan	14043 (5633-23656)	210.51 (85.18-357)	16454 (7069-28074)	175.25 (74.5-302.6)	-2.08 (-3.33--0.81)
Albania	804 (319-1413)	48.58 (18.47-86.18)	1928 (749-3531)	46.46 (18.08-85.71)	2.31 (1.74-2.87)
Algeria	15603 (6201-26235)	166.7 (65.67-292.51)	33272 (13316-56240)	114.23 (41.48-194.51)	-0.49 (-1.46-0.49)
American Samoa	40 (18-64)	158.26 (70.16-252.85)	89 (40-150)	174.06 (78.37-293.47)	1.59 (1.03-2.17)
Andorra	14 (5-27)	28.86 (10.98-56.3)	24 (10-49)	14.3 (5.88-28.03)	-0.86 (-1.44--0.27)
Angola	816 (332-1515)	26.23 (10.28-47.66)	2426 (947-4594)	26.68 (10.45-52.34)	-0.28 (-1.99-1.45)
Antigua and Barbuda	23 (9-41)	39.9 (15.56-71.48)	21 (8-37)	22.59 (8.39-41.05)	-2.02 (-2.33--1.71)
Argentina	6123 (2645-11286)	20.93 (8.97-40.13)	4743 (1787-9280)	8.21 (3.11-15.84)	-2.03 (-2.29--1.76)
Armenia	1849 (739-3175)	83.58 (33.08-142.21)	2544 (999-4631)	58.6 (23.2-105.01)	-0.29 (-0.74-0.16)
Australia	15837 (6584-27834)	82.86 (34.07-145.49)	9620 (4005-17610)	19.45 (8.57-33.96)	-4.16 (-4.74--3.57)
Austria	7353 (2806-13005)	58.19 (22.63-102.43)	4974 (1711-9980)	21.77 (7.91-42.46)	-2.83 (-3.76--1.88)
Azerbaijan	4020 (1538-6880)	99.89 (38.25-173.19)	6575 (2682-11922)	89.8 (35.41-164.62)	0.3 (-0.37-0.98)
Bahamas	61 (27-103)	42.12 (18.81-72.58)	94 (39-166)	25.24 (9.89-44.22)	-0.86 (-1.4--0.32)
Bahrain	327 (137-534)	245.93 (97.32-413.55)	570 (239-920)	92.45 (38.16-154.19)	-3.44 (-5.08--1.77)
Bangladesh	13448 (5619-24310)	29.41 (12.14-52.57)	35172 (14423-57968)	26.48 (10.93-44.32)	1.23 (0.21-2.25)
Barbados	210 (87-344)	71.72 (30.19-117.21)	197 (83-344)	37.96 (16.18-66.56)	-1.48 (-1.96--1)
Belarus	12317 (4800-21303)	100.94 (38.44-174.28)	17493 (7354-32466)	105.74 (44.23-192.05)	0.55 (-0.02-1.13)
Belgium	8499 (3084-15371)	53.12 (19.64-96.89)	3927 (1693-7519)	13.73 (6.04-25.29)	-3.75 (-4.68--2.81)
Belize	34 (14-58)	36.73 (15.68-63.4)	57 (22-98)	20.84 (7.98-36.64)	-2 (-2.91--1.09)
Benin	107 (42-211)	6.2 (2.33-12.09)	295 (105-580)	7.31 (2.53-15.33)	0.33 (-1.23-1.92)
Bermuda	41 (17-69)	71.79 (29.23-127.05)	28 (11-51)	18.65 (7.66-33.22)	-3.04 (-3.68--2.41)
Bhutan	362 (148-604)	147.74 (58.62-247.19)	794 (332-1341)	133.06 (55.27-226.29)	0.68 (-0.12-1.49)
Bolivia (Plurinational State of)	770 (258-1438)	29.18 (9.69-54.09)	1358 (491-2623)	17.83 (6.14-33.38)	-0.71 (-1.64-0.22)
Bosnia and Herzegovina	2004 (860-3439)	57.87 (24.37-102.63)	2777 (1079-5066)	43.06 (17-77.85)	0.16 (-0.39-0.72)
Botswana	270 (101-470)	57.23 (22.45-101.71)	580 (227-993)	46.32 (18.08-81.18)	-0.02 (-1.22-1.19)
Brazil	55227 (24892-88231)	72.26 (31.04-115.95)	90031 (36311-148582)	36.54 (14.91-60.28)	-0.84 (-1.36--0.32)
Brunei Darussalam	47 (20-80)	50.07 (20.22-88.3)	86 (36-150)	28.98 (10.98-54.95)	-0.53 (-1.67-0.63)
Bulgaria	8530 (3319-14397)	96.46 (35.09-165.79)	7710 (3056-13405)	53.92 (21.33-94.24)	-1.46 (-2.15--0.76)
Burkina Faso	531 (206-1027)	13.89 (5.33-26.19)	1288 (446-2417)	16.39 (5.59-31.59)	0.57 (-0.8-1.95)
Burundi	277 (105-511)	13.11 (5-24.6)	412 (156-754)	9.82 (3.9-18.99)	-1.88 (-3.35--0.39)
Cabo Verde	23 (8-42)	9.68 (3.59-17.55)	70 (26-138)	16.78 (6.16-33.06)	1.62 (1.05-2.2)
Cambodia	338 (129-617)	9.96 (3.44-18.9)	827 (278-1601)	9.33 (3.07-18.66)	0.35 (-0.93-1.66)
Cameroon	708 (263-1334)	18.58 (6.61-35)	2611 (993-4958)	24.88 (9.19-47.66)	0.87 (-0.63-2.38)
Canada	6574 (2160-13977)	20.7 (6.75-44.73)	5650 (1721-11440)	6.86 (2.23-13.48)	-2.75 (-3.43--2.06)
Central African Republic	258 (95-484)	26.58 (10.04-49.69)	445 (170-913)	24.19 (8.52-49.04)	-0.59 (-2.1-0.95)
Chad	419 (153-769)	16.13 (6-29.51)	932 (344-1710)	18.3 (6.91-33.11)	-0.28 (-1.72-1.18)
Chile	1613 (629-3145)	18.11 (6.8-36.42)	1545 (647-2947)	5.93 (2.5-11.29)	-2.32 (-2.64--2)
China	237710 (103506-396304)	40.72 (16.75-71.08)	827789 (365855-1470328)	46.05 (19.74-83.48)	2.33 (1.74-2.92)
Colombia	8081 (3271-13181)	47.02 (18.12-77.77)	16144 (6975-26089)	28.84 (12.61-46.7)	-0.15 (-0.74-0.44)
Comoros	15 (6-27)	8.59 (3.51-15.62)	39 (15-77)	8.68 (3.4-17.14)	0.64 (-0.41-1.7)
Congo	282 (114-505)	28.95 (11.16-52.03)	601 (234-1065)	24.59 (9.05-46.32)	-0.68 (-1.94-0.59)
Cook Islands	6 (3-11)	48.99 (20.66-83.12)	8 (3-15)	32.64 (13.55-56.99)	0.02 (-0.33-0.37)
Costa Rica	334 (130-606)	20.3 (7.84-38.17)	534 (213-967)	9.54 (3.81-17.34)	-1.19 (-1.7--0.67)
Côte d'Ivoire	716 (266-1267)	21.74 (8-39.19)	2257 (912-4112)	23.75 (9.22-45.2)	0.7 (-0.93-2.35)
Croatia	5368 (2192-8990)	106.04 (41.78-180.1)	5091 (2051-9221)	50.3 (20.56-91.04)	-0.98 (-1.68--0.27)
Cuba	6196 (2300-10932)	63.38 (24.17-112.24)	6537 (2434-11738)	31.52 (11.83-58.36)	-1.36 (-1.84--0.87)
Cyprus	494 (193-884)	91.33 (32.87-169.87)	483 (171-880)	27.86 (9.53-51.59)	-3.27 (-3.55--2.99)
Czechia	15430 (5776-25161)	112.59 (41.96-185.71)	12607 (5398-22538)	53.1 (22.65-93.81)	-1.31 (-2.01--0.61)
Democratic People's Republic of Korea	4521 (1724-8334)	37.34 (14.26-73.57)	11487 (4420-21720)	39.61 (14.73-76.01)	1.24 (0.77-1.72)
Democratic Republic of the Congo	4780 (1996-8591)	40.98 (16.02-72.67)	9420 (3713-17004)	35.01 (13.94-65.02)	-0.86 (-2.45-0.77)
Denmark	5916 (2461-10512)	67.38 (27.84-116.9)	1616 (606-3072)	11.92 (4.54-22.18)	-5.65 (-6.51--4.79)
Djibouti	9 (3-18)	8.23 (3.16-16.34)	55 (20-102)	10.54 (3.68-19.7)	1.51 (-0.04-3.09)
Dominica	20 (8-38)	34.79 (12.85-66.34)	16 (6-31)	21.36 (8.35-41.21)	-1.22 (-1.44--1)
Dominican Republic	1379 (588-2349)	42.54 (17.52-74.71)	4231 (1763-7342)	42.99 (17.94-75.21)	1.71 (1.08-2.34)
Ecuador	554 (222-990)	11.11 (4.44-20.84)	1390 (513-2755)	8.88 (3.23-17.82)	0.14 (-0.58-0.86)
Egypt	46307 (20477-72130)	195.66 (85.53-312.51)	85116 (37113-143459)	161.83 (67.21-280.85)	-0.23 (-1.3-0.86)
El Salvador	584 (228-1013)	20.35 (7.72-35.72)	1111 (375-2217)	16.9 (5.76-32.94)	0.46 (-0.03-0.96)
Equatorial Guinea	48 (19-89)	29.61 (11.4-55.86)	119 (47-236)	29.92 (11.09-58.72)	-0.63 (-2.3-1.06)
Eritrea	42 (16-81)	4.28 (1.46-8.96)	111 (44-213)	4.6 (1.73-8.93)	0.77 (-0.83-2.39)
Estonia	2124 (861-3821)	109.3 (42.94-197.55)	956 (368-1739)	27.88 (10.96-49.3)	-3.51 (-4.32--2.71)
Eswatini	66 (28-116)	27.7 (11.29-47.62)	173 (64-334)	36.13 (13.8-68.55)	1.86 (0.33-3.41)
Ethiopia	2215 (896-3924)	11.63 (4.53-21.02)	3462 (1338-6200)	8.34 (3.18-15.58)	-1.2 (-2.61-0.22)
Fiji	373 (164-630)	95.24 (40.59-158.28)	676 (280-1212)	87.56 (37.4-155)	0.45 (-0.18-1.07)
Finland	5367 (2049-9245)	73.15 (28-124.6)	3752 (1366-7126)	23.69 (9.23-43.01)	-2.62 (-3.56--1.67)
France	30528 (12137-55816)	33.92 (13.48-61.03)	21127 (8011-37876)	11.43 (4.64-20.33)	-2.83 (-3.78--1.88)
Gabon	59 (21-114)	12.15 (4.13-24.44)	91 (34-170)	11.51 (4.14-23.23)	-0.62 (-1.71-0.49)
Gambia	49 (18-92)	16.85 (6.1-33.27)	187 (74-335)	21.92 (8.38-40.94)	1.07 (-0.4-2.55)
Georgia	6134 (2473-10260)	110.52 (44.38-186.38)	2459 (949-4337)	37.52 (14.69-65.57)	-2.99 (-3.64--2.33)
Germany	75202 (28811-139208)	55.29 (21.16-100.35)	38959 (13397-78109)	15.88 (5.77-30.56)	-3.39 (-4.41--2.36)
Ghana	2057 (805-3629)	38.42 (15.12-67.62)	3317 (1388-5723)	23.9 (9.73-41.84)	-1.96 (-3.31--0.6)
Greece	5418 (2165-9846)	36.8 (14.56-67.27)	5667 (1995-10762)	18.04 (6.9-32.72)	-1.25 (-2.21--0.28)
Greenland	11 (4-22)	48.83 (18.21-101.89)	9 (3-16)	16.77 (6.34-30.31)	-2.34 (-3.1--1.57)
Grenada	31 (12-59)	40.58 (15.72-77.22)	26 (10-45)	26.57 (10.06-48.1)	-1.49 (-1.96--1.02)
Guam	24 (10-42)	42.48 (16.66-78.99)	51 (21-87)	24.14 (10.07-40.79)	0.54 (-0.08-1.18)
Guatemala	331 (135-609)	13.63 (5.03-28.61)	844 (314-1734)	9.35 (3.23-20.19)	0.07 (-1.43-1.6)
Guinea	320 (125-607)	10.78 (4.15-21.34)	575 (222-1096)	11.92 (4.47-22.94)	0.03 (-1.06-1.13)
Guinea-Bissau	124 (47-234)	35.41 (13.73-67.77)	234 (89-421)	38.74 (14.95-71.05)	0.07 (-1.5-1.66)
Guyana	236 (89-409)	68.89 (26.16-119.93)	268 (102-478)	46.51 (17.6-81.88)	-0.17 (-1.02-0.68)
Haiti	2421 (922-4141)	88.15 (32.33-156.4)	4292 (1667-8101)	69.32 (26.66-130.09)	-0.44 (-1.52-0.65)
Honduras	330 (118-616)	18.7 (6.58-34.82)	1530 (611-2878)	28.62 (11.34-57.94)	2 (0.83-3.19)
Hungary	11799 (4717-20618)	85.44 (34.04-151.97)	12216 (4639-21474)	55.86 (21.36-98.29)	-0.44 (-1.18-0.31)
Iceland	157 (63-291)	51.73 (21.01-94.74)	121 (48-228)	18.13 (7.44-33.35)	-2.67 (-3.2--2.13)
India	328687 (143168-520053)	79.42 (33.86-126.58)	845655 (392251-1356299)	78.73 (35.1-129.16)	0.63 (-0.1-1.38)
Indonesia	105869 (47210-168215)	124.67 (55.48-201.33)	327454 (143397-536799)	165.58 (73.39-269.26)	1.63 (0.82-2.45)
Iran (Islamic Republic of)	29595 (11680-48051)	131.5 (55.31-218.5)	51116 (22550-81831)	70.99 (31.92-116.36)	-0.93 (-1.76--0.1)
Iraq	15155 (5914-24570)	190.69 (75.72-312.48)	37679 (16266-62844)	170.24 (70.55-275.94)	-0.4 (-1.45-0.65)
Ireland	4119 (1682-7204)	102.19 (41.07-177.97)	1994 (788-3702)	23.49 (9.4-43.15)	-4.31 (-4.71--3.91)
Israel	2525 (989-4420)	53.88 (21.87-95.55)	1459 (503-2846)	10.53 (3.73-20.22)	-5.11 (-5.39--4.83)
Italy	44925 (18035-77203)	50.45 (20.38-86.65)	36774 (14296-66308)	19.41 (7.96-33.86)	-2.18 (-3.28--1.07)
Jamaica	743 (306-1252)	40.79 (16.87-68.29)	983 (430-1727)	30.74 (13.59-52.5)	-0.03 (-0.39-0.34)
Japan	42055 (16782-70712)	26.13 (10.5-45.48)	41261 (15810-74546)	11.07 (4.83-18.66)	-1.34 (-2.32--0.35)
Jordan	1189 (488-2132)	101.78 (41.21-181.59)	3023 (1187-5022)	48.44 (18.19-82.12)	-2.38 (-3.71--1.03)
Kazakhstan	8355 (3097-15215)	74.7 (26.49-139.4)	8725 (3534-16117)	60.45 (24.33-116.65)	-1.7 (-2.27--1.12)
Kenya	761 (314-1325)	9.81 (4.09-17.9)	3193 (1251-5630)	15.11 (5.8-26.61)	2.23 (0.82-3.65)
Kiribati	53 (23-90)	132.78 (57.03-226.09)	107 (43-190)	133.33 (52.85-240.73)	0.43 (-0.33-1.19)
Kuwait	1412 (653-2193)	207.6 (93.12-329.27)	3156 (1431-5065)	90.92 (38.56-147.25)	-1.83 (-2.69--0.97)
Kyrgyzstan	1917 (776-3271)	75.21 (30.15-130.57)	2774 (1167-4924)	80.26 (33.26-141.87)	0.33 (-0.55-1.21)
Lao People's Democratic Republic	472 (182-846)	26.05 (9.84-49.04)	677 (263-1225)	17.5 (6.39-33.75)	-1.29 (-2.4--0.16)
Latvia	3080 (1195-5320)	87.59 (34.54-151.94)	1885 (693-3474)	41.64 (15.83-75.66)	-1.68 (-2.48--0.87)
Lebanon	2653 (1121-4473)	129.39 (54.18-217.96)	3024 (1252-5574)	47.46 (19.87-86.16)	-2.44 (-2.81--2.07)
Lesotho	57 (19-107)	9.05 (2.72-17.4)	105 (40-200)	15.19 (5.3-29.87)	2.2 (0.86-3.55)
Liberia	447 (192-802)	40.79 (17.76-73.15)	953 (402-1681)	46.57 (18.56-82.71)	-0.22 (-1.42-0.99)
Libya	1849 (791-3110)	101.95 (43-172.11)	5580 (2372-9514)	111.29 (46.58-189.54)	1.51 (0.61-2.42)
Lithuania	6138 (2537-10734)	138.02 (56.35-242.38)	5692 (2196-10396)	82.44 (33.12-149.59)	-0.32 (-1.08-0.45)
Luxembourg	267 (101-477)	49.41 (18.84-89.97)	172 (64-334)	14.21 (5.5-26.8)	-3.7 (-4.34--3.05)
Madagascar	405 (149-762)	8.85 (3.31-16.79)	1057 (457-2044)	11.1 (4.57-20.92)	0.09 (-1.41-1.62)
Malawi	239 (98-439)	6.72 (2.72-12.46)	575 (219-1078)	8.33 (3.23-15.77)	0.33 (-1.08-1.77)
Malaysia	5878 (2384-10411)	67.79 (26.42-120.38)	17287 (7562-28534)	63.48 (26.76-105.41)	0.82 (0.02-1.63)
Maldives	234 (107-368)	244.4 (110.4-383.89)	273 (113-442)	86.22 (35.99-141.84)	-3.27 (-4.21--2.32)
Mali	743 (324-1354)	20.95 (8.93-38.49)	1546 (618-2960)	19.63 (7.92-37.25)	-0.46 (-1.82-0.91)
Malta	404 (170-668)	99.2 (41.5-164.97)	390 (155-718)	36.14 (14.38-66.69)	-2.08 (-2.77--1.38)
Marshall Islands	66 (28-105)	373.97 (159.65-601.12)	165 (75-271)	385.73 (172.73-648.16)	1.22 (0.31-2.14)
Mauritania	757 (298-1288)	78.97 (30.53-136.72)	1310 (524-2436)	63.19 (24.62-119.46)	-0.95 (-2.01-0.13)
Mauritius	310 (132-537)	48.97 (20.32-86.71)	375 (156-655)	21.53 (8.9-39.15)	-1.83 (-2.3--1.36)
Mexico	8317 (2991-13900)	23.56 (8.12-41.35)	25696 (10656-43831)	22.06 (9.02-38.92)	0.81 (-0.11-1.73)
Micronesia (Federated States of)	197 (85-319)	392.16 (166.85-633.4)	314 (132-532)	374.05 (157.69-614.71)	0.83 (0.09-1.58)
Monaco	27 (10-52)	33.17 (12.79-63.94)	19 (7-38)	16.25 (6.39-31.16)	-2.26 (-3.66--0.84)
Mongolia	341 (133-607)	39.75 (15.62-74.89)	426 (180-781)	26.94 (10.81-51.3)	-1.56 (-2.84--0.26)
Montenegro	282 (113-491)	48.77 (19.42-84.68)	587 (236-1013)	67.66 (26.78-118)	1.96 (1.6-2.32)
Morocco	25095 (11111-42104)	184.73 (81.75-314.7)	53228 (22290-87912)	166.54 (67.39-278.48)	0.4 (-0.22-1.01)
Mozambique	196 (77-368)	4.03 (1.54-7.71)	496 (194-985)	5.57 (2.01-10.99)	1.07 (-0.47-2.63)
Myanmar	2728 (1043-5162)	13.2 (4.98-24.64)	4217 (1679-7954)	9.79 (3.67-19.28)	-0.43 (-1.14-0.27)
Namibia	204 (87-354)	37.53 (15.07-65.42)	456 (185-829)	38.87 (14.84-69.19)	0.27 (-0.95-1.5)
Nauru	7 (3-13)	139.1 (52.36-248.4)	10 (4-18)	161.88 (66.65-298.99)	0.54 (-0.32-1.42)
Nepal	2215 (865-4010)	26.89 (10.25-49.45)	5516 (2069-10504)	26.65 (9.61-50.1)	1.09 (0.13-2.07)
Netherlands	5822 (2231-10873)	28.3 (10.73-51.88)	2908 (1139-5827)	7.3 (2.9-14.3)	-4.06 (-4.82--3.29)
New Zealand	2765 (1177-4714)	70.65 (29.97-123.02)	2573 (1077-4769)	27.81 (11.76-50.76)	-2.32 (-2.83--1.8)
Nicaragua	198 (77-352)	14.64 (5.47-27.44)	605 (228-1160)	14.11 (5-28.39)	1.17 (0.14-2.21)
Niger	387 (137-755)	17.24 (5.99-33.97)	1285 (454-2580)	18.56 (6.64-36.21)	0.3 (-1.42-2.04)
Nigeria	12411 (5388-21311)	32.32 (13.61-57.48)	24315 (9152-42099)	31.39 (12.4-54.5)	-0.48 (-1.85-0.9)
Niue	2 (1-3)	80.99 (34.13-144.22)	2 (1-3)	75.59 (32.63-125.98)	0.03 (-0.22-0.27)
North Macedonia	1015 (414-1772)	61.55 (25.05-106.79)	1523 (614-2722)	63.02 (23.75-118.38)	0.25 (-0.08-0.58)
Northern Mariana Islands	9 (4-16)	44.92 (16.91-77.07)	25 (11-42)	47.06 (20.48-77.67)	2.21 (1.41-3.02)
Norway	4517 (1680-8084)	60.52 (23.4-107.74)	1684 (619-3096)	14.37 (5.32-26.17)	-4.61 (-5.48--3.74)
Oman	1100 (497-1869)	180.19 (80.45-311.4)	1723 (725-2994)	105.92 (43.42-186.17)	-1.25 (-2.71-0.23)
Pakistan	27964 (11488-46778)	52.22 (21.06-87.68)	78017 (33347-132754)	68.4 (28.84-116.67)	0.76 (-0.27-1.8)
Palau	8 (3-14)	86.37 (36.47-156.04)	16 (7-28)	71.55 (29.37-123.24)	0.55 (0.18-0.92)
Palestine	1336 (563-2210)	168.11 (70.2-280.28)	2269 (968-3631)	106.7 (44.48-177.53)	-1.49 (-2.88--0.08)
Panama	241 (92-431)	17.53 (6.59-31.68)	430 (161-791)	9.48 (3.58-17.31)	-0.83 (-1.27--0.39)
Papua New Guinea	992 (404-1833)	49.71 (20.17-89.56)	2704 (1043-4857)	47.53 (17.2-84.48)	-0.01 (-0.97-0.97)
Paraguay	358 (126-659)	17.47 (6.33-32.44)	757 (301-1386)	13.75 (5.35-25.33)	0.21 (-0.5-0.92)
Peru	1760 (695-3348)	16.09 (6.19-31.29)	3138 (1268-5950)	9.37 (3.77-17.88)	-1.13 (-1.78--0.48)
Philippines	6386 (2524-11027)	27.37 (10.11-50.16)	18748 (7917-32242)	25.91 (10.93-44.98)	0.69 (-0.33-1.71)
Poland	43692 (17993-71730)	105.22 (43.37-172.43)	37739 (16612-64399)	48.3 (21.07-81.11)	-1.74 (-2.29--1.18)
Portugal	5784 (2282-9923)	45.19 (17.73-80.42)	4261 (1613-7947)	14.62 (5.55-26.42)	-2.9 (-3.77--2.03)
Puerto Rico	1820 (748-3187)	53.3 (21.51-94.04)	1183 (467-2227)	14.58 (5.95-26.75)	-3.23 (-3.89--2.57)
Qatar	203 (81-325)	234.91 (89.3-383.35)	545 (221-959)	75.41 (29.84-133.99)	-4.22 (-6.19--2.22)
Republic of Korea	4368 (1802-7354)	20.18 (7.56-37.5)	8435 (3132-15768)	9.32 (3.47-17.53)	-1.09 (-1.66--0.52)
Republic of Moldova	4106 (1583-7093)	123.58 (48.85-216.16)	4277 (1523-7550)	70.43 (25.62-124.38)	-1.1 (-1.55--0.66)
Romania	21030 (9017-34320)	88.98 (38.69-151.01)	21206 (8667-36561)	51.9 (21.41-87.72)	-1.06 (-1.66--0.46)
Russian Federation	161549 (66770-270407)	105.53 (42.95-179.88)	180320 (75651-305089)	73.32 (30.25-124.3)	-0.65 (-1.13--0.16)
Rwanda	308 (122-600)	12.47 (4.68-24.07)	420 (152-814)	8.23 (2.88-16.34)	-2.15 (-3.65--0.64)
Saint Kitts and Nevis	27 (11-47)	73.92 (32-125.98)	16 (6-29)	30.09 (10.76-54.45)	-2.7 (-3.03--2.36)
Saint Lucia	33 (12-59)	44.68 (16.03-84.38)	33 (12-61)	14.07 (5.3-26.59)	-2.94 (-3.55--2.33)
Saint Vincent and the Grenadines	38 (14-66)	58.59 (21.01-102.57)	39 (15-72)	30.4 (11.32-57.64)	-1.23 (-1.68--0.79)
Samoa	118 (52-193)	139.16 (59.94-231.25)	231 (97-386)	155.64 (63.54-259.02)	0.98 (0.27-1.69)
San Marino	9 (3-18)	24.63 (8.74-47.44)	8 (3-16)	8.36 (2.99-16.3)	-2.12 (-3.24--0.99)
Sao Tome and Principe	7 (3-12)	11.7 (4.81-22.55)	13 (5-24)	14.13 (5.24-26.19)	0.36 (-0.78-1.52)
Saudi Arabia	8307 (3610-14136)	157.67 (64.85-271.24)	27304 (10896-44853)	139.18 (55.66-229.67)	0.25 (-1.06-1.57)
Senegal	1068 (441-1888)	35.91 (15.2-61.37)	2424 (974-4436)	34.54 (13.48-64.62)	-0.04 (-1.24-1.17)
Serbia	7720 (3010-12943)	95.7 (37.84-168.15)	9892 (3520-17700)	56.55 (20.38-101.53)	-0.81 (-1.36--0.26)
Seychelles	21 (9-38)	38.44 (16.45-68.34)	28 (11-47)	28.22 (10.61-50.09)	-0.59 (-0.89--0.3)
Sierra Leone	528 (211-967)	28.54 (11.28-53.77)	1031 (426-1799)	30.92 (13.02-53.49)	0.04 (-1.17-1.27)
Singapore	874 (380-1525)	40.25 (17.11-71.08)	941 (393-1663)	11.01 (4.76-19.34)	-3.31 (-3.66--2.97)
Slovakia	4651 (1801-7824)	80.58 (30.76-135.3)	4816 (1775-8872)	50.65 (18.53-93.65)	-0.66 (-1.1--0.21)
Slovenia	954 (398-1657)	38.82 (16.19-67.75)	731 (260-1314)	13.51 (5.07-23.93)	-2.72 (-3.51--1.93)
Solomon Islands	178 (73-318)	124.67 (53.04-222.09)	456 (188-799)	123.64 (53.18-213.1)	0.38 (-0.68-1.44)
Somalia	165 (60-317)	8.05 (2.95-15.49)	445 (168-878)	8.76 (3.27-17.46)	0.1 (-1.72-1.96)
South Africa	12614 (5595-20385)	63.37 (27.57-105.29)	26050 (11708-41073)	62.37 (27.78-100.77)	0.19 (-0.52-0.91)
South Sudan	173 (67-325)	7.59 (2.83-14.72)	299 (111-566)	8.84 (3.12-16.9)	0.12 (-1.39-1.65)
Spain	18541 (7552-33719)	34.34 (14.22-62.81)	15010 (5859-27841)	12.4 (4.98-22.21)	-2.58 (-3.49--1.65)
Sri Lanka	1211 (469-2136)	12.52 (4.81-22.79)	2569 (932-4779)	9.98 (3.64-19.01)	0.79 (0.35-1.23)
Sudan	64513 (29916-101533)	647.07 (293.16-1026.7)	96213 (41132-166474)	435.9 (189.04-752.7)	-1.44 (-2.41--0.47)
Suriname	165 (71-287)	65.89 (27.74-116.41)	232 (99-397)	36.75 (15.63-63.15)	-0.94 (-1.39--0.5)
Sweden	7318 (2914-13557)	43.53 (17.49-78.53)	3230 (1209-5905)	12.42 (4.8-21.94)	-3.75 (-4.82--2.67)
Switzerland	5104 (1955-9413)	44.91 (17.4-81.04)	2790 (956-5504)	11.88 (4.33-22.47)	-3.82 (-4.8--2.84)
Syrian Arab Republic	10487 (4402-16940)	212.93 (90.82-344.54)	22678 (9992-39504)	196.92 (86.84-352.58)	0.64 (-0.59-1.87)
Taiwan (Province of China)	3651 (1635-6078)	26.51 (11.75-45.54)	5742 (2462-9806)	13.55 (5.85-22.91)	-0.45 (-0.91-0.02)
Tajikistan	1940 (771-3306)	82.1 (31.58-142.15)	2631 (1113-4845)	68.89 (28.71-131.12)	-1.11 (-2.42-0.22)
Thailand	6870 (2653-12041)	26.19 (9.84-47.06)	15618 (6015-28392)	14.47 (5.62-26.33)	-0.55 (-1.16-0.06)
Timor-Leste	32 (14-61)	13.35 (5.32-26.22)	104 (38-194)	13.95 (4.96-26.92)	1.29 (0.05-2.54)
Togo	138 (56-270)	13.91 (5.31-26.48)	427 (160-799)	14.81 (5.31-28.12)	0.37 (-1.29-2.05)
Tokelau	1 (0-2)	81 (31.28-144.36)	1 (0-2)	68.76 (25.73-121.55)	-0.06 (-0.25-0.14)
Tonga	28 (11-49)	49.38 (20.19-87.04)	40 (17-68)	49.12 (20.69-82.81)	0.62 (0.04-1.21)
Trinidad and Tobago	1013 (435-1594)	130.09 (54.59-211.81)	1232 (536-2139)	63.01 (27.45-109.54)	-1.69 (-2.06--1.31)
Tunisia	2991 (1065-5276)	80.68 (28.32-147.07)	7268 (2790-13056)	62.73 (24.53-114.39)	0.27 (-0.39-0.93)
Turkey	30322 (12237-49495)	102.39 (40.44-168.96)	59667 (25376-103386)	70.21 (29.67-121.8)	0.12 (-0.43-0.68)
Turkmenistan	1679 (671-2894)	113.76 (45.87-197.83)	3112 (1145-5532)	102.14 (37.84-184.08)	-0.54 (-1.61-0.55)
Tuvalu	7 (3-12)	106.7 (41.95-182.95)	9 (4-16)	91.21 (33.98-152.94)	-0.26 (-0.6-0.07)
Uganda	431 (172-817)	7.83 (3.03-15.33)	1025 (383-1935)	8.31 (2.93-16.16)	-0.71 (-2.43-1.04)
Ukraine	45675 (17768-81176)	70.81 (25.88-131.91)	65715 (22698-129523)	80.39 (27.84-157.31)	0.63 (0.02-1.25)
United Arab Emirates	619 (255-1082)	158.25 (65.96-282.26)	2360 (881-4055)	93.18 (33.85-169.84)	-0.85 (-3.16-1.51)
United Kingdom	191136 (81755-306699)	204.95 (88.19-328.02)	73590 (31451-117937)	52.85 (22.82-83.99)	-4.39 (-5.18--3.6)
United Republic of Tanzania	245 (93-468)	2.47 (0.91-4.8)	723 (277-1412)	3.13 (1.16-6.28)	0.43 (-0.88-1.76)
United States of America	166696 (64341-308958)	49.67 (19.68-91.41)	143724 (53926-244466)	22.95 (8.62-38.46)	-2.34 (-2.98--1.69)
United States Virgin Islands	38 (15-67)	62.14 (23.57-113.52)	44 (17-82)	25.66 (9.61-48.68)	-0.82 (-1.31--0.34)
Uruguay	1104 (437-2054)	28.49 (11.41-53.47)	696 (268-1311)	11.92 (4.74-21.2)	-2.34 (-2.87--1.8)
Uzbekistan	4629 (1822-8560)	44.85 (17.22-84.03)	9068 (3855-16716)	47.25 (18.41-88.53)	0.3 (-0.7-1.31)
Vanuatu	12 (5-22)	22.71 (9.27-42.1)	32 (13-57)	22.07 (8.34-39.43)	0.06 (-1.24-1.37)
Venezuela (Bolivarian Republic of)	2574 (1111-4441)	29.13 (12.13-51.66)	6847 (2577-12336)	23.83 (8.98-43.29)	0.25 (-0.43-0.94)
Viet Nam	3547 (1315-6838)	9.61 (3.56-18.72)	10120 (3824-18776)	11.21 (4.07-21.73)	1.99 (1.35-2.64)
Yemen	8846 (3606-15978)	198 (79.57-356.11)	20553 (8521-35679)	159.5 (63.23-281.03)	-0.63 (-2.05-0.82)
Zambia	260 (105-471)	10.14 (3.97-18.31)	873 (337-1562)	14.45 (5.36-26.49)	1.01 (-0.6-2.64)
Zimbabwe	551 (217-1007)	19.15 (7.21-36.62)	1433 (551-2534)	28.31 (11.15-51.83)	2.05 (0.4-3.73)
Abbreviations:EAPC: Estimated Annual Percentage Change; UI: Uncertainty Interval; CI: Confidence Interval
Appendix Table 6 Deaths of IHD due to insufficient physical activity in middle-aged and elderly populations by countries from 1990 to 2021: Age-standardized rates and case numbers.
	Rate Per 100 000(95%UI)
	1990		2021
location name	Num 95%UI	ASR 95%UI	Num 95%UI	ASR 95%UI	EAPC 95%CI
Afghanistan	580 (235-997)	10.16 (3.96-17.73)	657 (280-1148)	8.84 (3.69-15.74)	-1.96 (-3.42--0.48)
Albania	52 (19-93)	3.4 (1.26-6.38)	141 (53-268)	3.59 (1.33-6.8)	2.73 (2.09-3.37)
Algeria	743 (295-1306)	10.65 (3.97-19.19)	1872 (662-3216)	7.86 (2.76-13.7)	0.03 (-1.26-1.33)
American Samoa	1 (1-2)	6.34 (2.9-10.33)	3 (1-5)	6.9 (3.11-12.22)	1.7 (0.91-2.51)
Andorra	1 (0-2)	1.97 (0.71-3.96)	2 (1-4)	1.02 (0.39-2.11)	-0.34 (-1-0.32)
Angola	35 (14-64)	1.46 (0.51-2.8)	112 (45-215)	1.58 (0.59-3.28)	-0.07 (-2.11-2.01)
Antigua and Barbuda	1 (1-3)	2.53 (0.9-4.89)	1 (0-2)	1.51 (0.54-2.81)	-2.05 (-2.4--1.71)
Argentina	386 (153-797)	1.43 (0.55-3.09)	333 (115-705)	0.57 (0.2-1.19)	-1.71 (-1.98--1.43)
Armenia	127 (48-225)	6.14 (2.26-10.96)	192 (70-365)	4.43 (1.65-8.37)	-0.1 (-0.63-0.44)
Australia	991 (402-1774)	5.41 (2.13-9.88)	712 (271-1370)	1.3 (0.51-2.47)	-3.86 (-4.5--3.22)
Austria	522 (195-950)	4.17 (1.55-7.6)	421 (143-878)	1.71 (0.58-3.49)	-2.35 (-3.33--1.35)
Azerbaijan	260 (98-467)	7.18 (2.67-13.21)	434 (167-806)	6.53 (2.46-12.43)	0.55 (-0.24-1.34)
Bahamas	3 (1-6)	2.36 (0.93-4.35)	5 (2-9)	1.51 (0.53-2.72)	-0.79 (-1.45--0.13)
Bahrain	14 (5-23)	14.99 (5.73-25.77)	25 (10-41)	6.19 (2.49-10.99)	-3.2 (-5.37--0.97)
Bangladesh	579 (240-1039)	1.4 (0.57-2.49)	1706 (695-2864)	1.4 (0.55-2.41)	1.53 (0.36-2.73)
Barbados	13 (5-23)	4.47 (1.8-7.71)	12 (5-22)	2.31 (0.91-4.26)	-1.6 (-2.1--1.09)
Belarus	864 (331-1545)	7.38 (2.84-13.41)	1285 (492-2475)	7.73 (2.98-14.88)	0.7 (0.17-1.23)
Belgium	597 (211-1104)	3.77 (1.3-7.03)	314 (123-638)	0.98 (0.4-1.93)	-3.46 (-4.46--2.46)
Belize	2 (1-4)	2.17 (0.88-3.94)	3 (1-6)	1.24 (0.46-2.38)	-2.04 (-3.02--1.06)
Benin	6 (2-12)	0.39 (0.14-0.82)	17 (6-36)	0.48 (0.16-1.07)	0.49 (-1.23-2.24)
Bermuda	3 (1-5)	4.78 (1.81-9.17)	2 (1-4)	1.28 (0.47-2.45)	-2.73 (-3.38--2.07)
Bhutan	13 (5-23)	6.66 (2.52-11.26)	37 (16-64)	6.65 (2.79-11.69)	1.31 (0.32-2.3)
Bolivia (Plurinational State of)	42 (14-79)	1.88 (0.61-3.84)	80 (27-154)	1.19 (0.38-2.36)	-0.43 (-1.53-0.69)
Bosnia and Herzegovina	110 (46-199)	3.64 (1.46-6.86)	193 (69-361)	3.01 (1.1-5.57)	0.77 (0.21-1.34)
Botswana	12 (5-21)	3.2 (1.23-5.87)	27 (10-48)	2.63 (1.05-4.8)	0.18 (-1.27-1.66)
Brazil	2914 (1228-4737)	4.44 (1.84-7.48)	4890 (1895-8148)	2.04 (0.79-3.43)	-0.88 (-1.5--0.26)
Brunei Darussalam	2 (1-4)	2.95 (1.12-5.58)	4 (1-7)	1.77 (0.59-3.57)	-0.5 (-2.04-1.06)
Bulgaria	526 (191-894)	7.44 (2.5-13.61)	551 (204-1004)	3.92 (1.44-7.16)	-1.29 (-1.93--0.65)
Burkina Faso	25 (9-49)	0.77 (0.27-1.48)	66 (22-127)	0.95 (0.32-1.92)	0.82 (-0.74-2.39)
Burundi	13 (5-24)	0.69 (0.26-1.41)	18 (7-35)	0.55 (0.21-1.16)	-1.82 (-3.54--0.07)
Cabo Verde	1 (0-3)	0.57 (0.2-1.17)	5 (1-10)	1.12 (0.36-2.39)	2.02 (1.5-2.55)
Cambodia	17 (6-33)	0.64 (0.2-1.36)	48 (15-96)	0.66 (0.2-1.47)	0.78 (-0.79-2.38)
Cameroon	33 (12-63)	1.06 (0.38-2.07)	124 (45-238)	1.46 (0.52-2.97)	0.96 (-0.79-2.75)
Canada	481 (146-1114)	1.55 (0.45-3.64)	463 (134-1030)	0.53 (0.15-1.14)	-2.55 (-3.27--1.82)
Central African Republic	10 (4-19)	1.41 (0.52-2.82)	18 (7-35)	1.31 (0.41-2.75)	-0.53 (-2.42-1.39)
Chad	21 (7-38)	0.88 (0.31-1.69)	42 (16-76)	0.99 (0.38-1.99)	-0.41 (-2.02-1.23)
Chile	97 (35-210)	1.21 (0.4-2.76)	95 (31-200)	0.36 (0.12-0.75)	-2.47 (-2.83--2.1)
China	12808 (5227-22545)	2.86 (1.12-5.37)	57721 (23735-106094)	3.52 (1.43-6.58)	2.95 (2.12-3.79)
Colombia	356 (135-600)	2.33 (0.85-4.11)	821 (330-1498)	1.44 (0.58-2.58)	0.06 (-0.58-0.7)
Comoros	1 (0-1)	0.45 (0.17-0.85)	2 (1-4)	0.46 (0.18-0.95)	0.78 (-0.47-2.05)
Congo	11 (4-21)	1.47 (0.53-2.91)	25 (9-46)	1.31 (0.41-2.74)	-0.53 (-2.09-1.04)
Cook Islands	0 (0-0)	2.27 (0.94-4.01)	0 (0-1)	1.57 (0.59-2.89)	0.34 (-0.11-0.8)
Costa Rica	20 (7-42)	1.28 (0.46-2.73)	33 (12-66)	0.57 (0.2-1.14)	-1.15 (-1.7--0.6)
C么te d'Ivoire	31 (11-55)	1.2 (0.43-2.32)	101 (39-194)	1.33 (0.46-2.73)	0.82 (-1.11-2.78)
Croatia	382 (150-656)	8.04 (3.1-14)	422 (156-775)	4.15 (1.54-7.6)	-0.63 (-1.29-0.03)
Cuba	380 (131-720)	4.13 (1.39-7.97)	436 (156-857)	2.01 (0.72-3.89)	-1.3 (-1.82--0.78)
Cyprus	33 (12-61)	7.24 (2.44-14.21)	34 (11-67)	2.24 (0.73-4.47)	-3.11 (-3.51--2.71)
Czechia	996 (358-1711)	7.62 (2.76-13.4)	962 (395-1733)	4.01 (1.63-7.19)	-0.78 (-1.47--0.1)
Democratic People's Republic of Korea	247 (92-492)	2.52 (0.85-5.07)	701 (239-1353)	2.7 (0.87-5.39)	1.51 (0.77-2.26)
Democratic Republic of the Congo	225 (90-410)	2.45 (0.94-4.43)	471 (186-864)	2.13 (0.81-4.08)	-0.72 (-2.56-1.15)
Denmark	433 (174-809)	4.86 (1.96-9.1)	128 (44-252)	0.89 (0.31-1.73)	-5.49 (-6.4--4.56)
Djibouti	0 (0-1)	0.46 (0.17-0.98)	2 (1-4)	0.6 (0.2-1.19)	1.6 (-0.36-3.6)
Dominica	1 (0-3)	2.46 (0.85-5)	1 (0-2)	1.55 (0.56-3.21)	-1.15 (-1.38--0.92)
Dominican Republic	72 (28-130)	2.65 (0.97-5.1)	230 (91-443)	2.41 (0.94-4.66)	1.67 (0.93-2.42)
Ecuador	28 (11-57)	0.63 (0.23-1.33)	75 (25-158)	0.51 (0.17-1.12)	0.31 (-0.52-1.15)
Egypt	1953 (850-3126)	11.08 (4.67-18.93)	3759 (1590-6441)	9.32 (3.59-16.56)	0.05 (-1.39-1.52)
El Salvador	33 (11-63)	1.19 (0.39-2.27)	73 (24-159)	1.03 (0.33-2.22)	0.86 (0.38-1.35)
Equatorial Guinea	2 (1-4)	1.64 (0.61-3.18)	6 (2-12)	1.83 (0.63-3.62)	-0.21 (-2.15-1.76)
Eritrea	2 (1-3)	0.22 (0.07-0.49)	4 (2-9)	0.25 (0.08-0.52)	0.97 (-1.04-3.02)
Estonia	157 (60-289)	8.53 (3.18-15.72)	82 (29-157)	2.27 (0.85-4.3)	-3.17 (-3.96--2.38)
Eswatini	3 (1-5)	1.59 (0.6-2.96)	7 (3-14)	1.99 (0.75-4)	1.66 (-0.22-3.57)
Ethiopia	84 (33-150)	0.55 (0.21-1.06)	151 (57-278)	0.42 (0.16-0.82)	-0.84 (-2.49-0.82)
Fiji	13 (5-21)	4.08 (1.66-7.06)	25 (11-45)	4.11 (1.73-7.82)	0.71 (-0.26-1.69)
Finland	354 (134-662)	4.89 (1.85-9.1)	312 (105-623)	1.81 (0.64-3.53)	-2.02 (-3.01--1.01)
France	2246 (851-4311)	2.46 (0.93-4.68)	1731 (601-3274)	0.81 (0.29-1.49)	-2.71 (-3.75--1.66)
Gabon	3 (1-7)	0.77 (0.24-1.68)	5 (2-10)	0.76 (0.23-1.73)	-0.52 (-1.81-0.79)
Gambia	2 (1-5)	0.99 (0.35-2.13)	10 (4-19)	1.3 (0.45-2.7)	1.26 (-0.43-2.97)
Georgia	423 (163-736)	8.13 (3.1-14.4)	178 (68-331)	2.59 (0.99-4.75)	-2.81 (-3.51--2.11)
Germany	5512 (1869-10589)	4.08 (1.36-7.82)	3259 (1056-6807)	1.24 (0.41-2.54)	-3.09 (-4.15--2.02)
Ghana	93 (36-163)	2.17 (0.84-3.84)	160 (65-284)	1.44 (0.55-2.7)	-1.74 (-3.35--0.1)
Greece	377 (139-709)	2.7 (0.98-5.21)	477 (159-961)	1.34 (0.46-2.56)	-0.94 (-1.94-0.08)
Greenland	1 (0-1)	3.29 (1.2-7.66)	0 (0-1)	1.16 (0.4-2.3)	-2.23 (-3.32--1.12)
Grenada	2 (1-4)	2.24 (0.85-4.4)	1 (1-3)	1.72 (0.61-3.18)	-1.53 (-2--1.05)
Guam	1 (0-2)	2.76 (0.98-5.52)	2 (1-5)	1.12 (0.44-1.99)	0.25 (-0.57-1.07)
Guatemala	19 (7-38)	0.98 (0.3-2.27)	57 (18-130)	0.71 (0.21-1.73)	0.51 (-1.27-2.33)
Guinea	17 (6-33)	0.63 (0.22-1.31)	31 (11-61)	0.73 (0.25-1.51)	0.26 (-0.97-1.5)
Guinea-Bissau	5 (2-10)	1.87 (0.67-3.47)	10 (4-18)	2.17 (0.83-4.34)	0.19 (-1.68-2.1)
Guyana	12 (5-21)	3.9 (1.46-6.91)	13 (5-24)	2.71 (0.96-5.03)	-0.1 (-1.14-0.95)
Haiti	110 (41-193)	5 (1.75-9.61)	196 (75-368)	3.92 (1.41-7.76)	-0.45 (-1.8-0.92)
Honduras	17 (6-32)	1.15 (0.35-2.27)	84 (32-176)	1.84 (0.64-4.22)	2.04 (0.65-3.45)
Hungary	766 (287-1407)	6.02 (2.25-11.16)	929 (340-1634)	4.13 (1.51-7.23)	-0.02 (-0.75-0.71)
Iceland	11 (4-21)	3.56 (1.34-6.81)	10 (4-20)	1.35 (0.52-2.65)	-2.27 (-2.87--1.67)
India	14133 (6040-22530)	4.19 (1.72-6.89)	43958 (18848-73225)	4.63 (1.91-7.71)	1.29 (0.33-2.27)
Indonesia	4813 (2132-7834)	6.76 (2.84-11.25)	15889 (6984-25977)	9.93 (4.33-16.81)	1.92 (0.88-2.98)
Iran (Islamic Republic of)	1290 (536-2162)	7.42 (3.01-12.97)	2734 (1222-4601)	4.19 (1.84-7.17)	-0.45 (-1.51-0.62)
Iraq	658 (266-1085)	8.9 (3.58-14.92)	1647 (676-2674)	9.26 (3.49-15.28)	-0.17 (-1.42-1.1)
Ireland	267 (106-480)	6.98 (2.67-12.83)	151 (58-294)	1.74 (0.66-3.36)	-3.87 (-4.28--3.47)
Israel	161 (62-304)	3.67 (1.37-7.05)	114 (37-240)	0.78 (0.26-1.61)	-4.66 (-4.97--4.35)
Italy	3005 (1170-5418)	3.49 (1.36-6.32)	3099 (1144-5880)	1.46 (0.54-2.69)	-1.65 (-2.83--0.45)
Jamaica	44 (17-78)	2.37 (0.9-4.18)	58 (23-109)	1.71 (0.69-3.06)	-0.09 (-0.47-0.29)
Japan	2411 (904-4507)	1.6 (0.59-3.08)	2941 (1015-5831)	0.58 (0.22-1.06)	-1.22 (-2.41--0.02)
Jordan	54 (22-96)	5.68 (2.3-10.19)	145 (55-249)	2.94 (1.06-5.1)	-2.07 (-3.68--0.43)
Kazakhstan	483 (164-953)	4.73 (1.57-9.68)	524 (210-1045)	4.18 (1.58-8.75)	-1.37 (-2.06--0.68)
Kenya	32 (13-60)	0.49 (0.2-0.96)	133 (51-234)	0.79 (0.29-1.49)	2.3 (0.64-3.99)
Kiribati	2 (1-3)	5.2 (2.26-8.96)	4 (1-6)	5.44 (2.12-9.92)	0.46 (-0.56-1.48)
Kuwait	49 (22-78)	9.64 (4.3-15.63)	114 (49-184)	4.3 (1.76-7.24)	-1.79 (-2.95--0.62)
Kyrgyzstan	128 (50-229)	5.39 (2.07-9.85)	193 (76-359)	6.08 (2.4-11.42)	0.6 (-0.37-1.58)
Lao People's Democratic Republic	20 (8-37)	1.41 (0.49-2.86)	34 (12-66)	1.07 (0.35-2.25)	-0.79 (-2.16-0.59)
Latvia	193 (72-357)	5.67 (2.17-10.73)	135 (49-260)	2.77 (1-5.21)	-1.27 (-2.09--0.45)
Lebanon	120 (49-206)	6.82 (2.69-11.89)	188 (70-370)	2.8 (1.06-5.5)	-1.75 (-2.21--1.28)
Lesotho	4 (1-7)	0.68 (0.2-1.38)	6 (2-12)	1.09 (0.36-2.22)	1.94 (0.4-3.5)
Liberia	20 (8-35)	2.03 (0.85-3.74)	39 (16-68)	2.32 (0.92-4.12)	-0.33 (-1.7-1.05)
Libya	90 (38-155)	5.48 (2.26-9.68)	256 (106-453)	6.05 (2.42-10.86)	1.57 (0.51-2.64)
Lithuania	436 (177-817)	10.05 (4.03-19)	453 (173-875)	6.21 (2.38-11.88)	-0.04 (-0.8-0.72)
Luxembourg	19 (7-35)	3.58 (1.34-6.87)	14 (5-29)	1.07 (0.37-2.23)	-3.35 (-4.02--2.69)
Madagascar	18 (7-34)	0.47 (0.18-0.93)	44 (18-83)	0.61 (0.23-1.22)	0.03 (-1.78-1.88)
Malawi	10 (4-18)	0.33 (0.13-0.66)	24 (9-46)	0.41 (0.16-0.82)	0.36 (-1.26-2.02)
Malaysia	277 (106-481)	3.44 (1.31-6.02)	801 (328-1365)	3.31 (1.35-5.78)	0.72 (-0.24-1.69)
Maldives	8 (4-13)	10.62 (4.71-16.65)	13 (5-22)	4.81 (1.89-8.29)	-2.28 (-3.44--1.11)
Mali	33 (14-59)	1.11 (0.45-2.15)	69 (27-131)	1.04 (0.39-2.06)	-0.39 (-1.99-1.23)
Malta	25 (10-42)	6.44 (2.54-11.28)	29 (11-54)	2.46 (0.97-4.65)	-1.68 (-2.41--0.96)
Marshall Islands	2 (1-3)	14.39 (6.1-23.31)	5 (2-8)	14.36 (6.36-24.41)	1.05 (-0.13-2.26)
Mauritania	33 (13-58)	3.87 (1.45-6.93)	59 (22-113)	3.21 (1.17-6.11)	-0.86 (-2.06-0.35)
Mauritius	16 (6-28)	2.91 (1.13-5.58)	22 (8-42)	1.33 (0.5-2.68)	-1.51 (-2.08--0.95)
Mexico	490 (166-896)	1.61 (0.53-3.04)	1586 (614-2937)	1.46 (0.56-2.73)	0.9 (-0.12-1.94)
Micronesia (Federated States of)	7 (3-11)	15.37 (6.41-24.83)	10 (4-17)	14.89 (6.02-25.13)	0.75 (-0.2-1.71)
Monaco	2 (1-4)	2.24 (0.77-4.58)	1 (1-3)	1.14 (0.42-2.38)	-2.05 (-3.59--0.48)
Mongolia	20 (8-39)	2.7 (0.97-5.63)	26 (10-50)	1.97 (0.71-4.09)	-1.44 (-2.97-0.12)
Montenegro	18 (7-33)	3.23 (1.22-6.05)	41 (16-73)	5.11 (1.96-9.52)	2.44 (2.11-2.78)
Morocco	1183 (513-2017)	9.77 (4.12-16.96)	2664 (1038-4531)	9.51 (3.64-16.34)	0.66 (-0.1-1.43)
Mozambique	9 (3-17)	0.23 (0.08-0.47)	22 (8-44)	0.32 (0.11-0.72)	1.09 (-0.74-2.95)
Myanmar	122 (45-234)	0.71 (0.26-1.46)	221 (77-452)	0.59 (0.19-1.31)	0 (-0.89-0.91)
Namibia	9 (4-16)	2.13 (0.8-3.98)	22 (8-39)	2.26 (0.82-4.25)	0.45 (-1.04-1.97)
Nauru	0 (0-0)	5.52 (2.1-9.93)	0 (0-1)	6.8 (2.67-12.95)	0.74 (-0.42-1.9)
Nepal	98 (37-182)	1.45 (0.53-2.83)	282 (98-538)	1.57 (0.53-3.16)	1.49 (0.31-2.68)
Netherlands	393 (135-781)	1.91 (0.66-3.83)	233 (85-509)	0.56 (0.21-1.22)	-3.52 (-4.31--2.72)
New Zealand	190 (75-334)	5.06 (1.94-9.13)	206 (79-401)	2.14 (0.82-4.15)	-1.97 (-2.51--1.42)
Nicaragua	11 (4-22)	0.93 (0.3-1.91)	36 (12-78)	0.94 (0.31-2.13)	1.44 (0.29-2.6)
Niger	17 (6-35)	1 (0.31-2.06)	59 (21-117)	1.06 (0.36-2.1)	0.34 (-1.67-2.4)
Nigeria	630 (262-1124)	1.91 (0.77-3.66)	1207 (467-2117)	1.88 (0.71-3.41)	-0.49 (-2.07-1.12)
Niue	0 (0-0)	3.86 (1.52-7.29)	0 (0-0)	3.72 (1.48-7.03)	0.05 (-0.17-0.27)
North Macedonia	59 (23-102)	3.84 (1.45-6.83)	99 (38-184)	4.94 (1.71-9.53)	0.83 (0.28-1.39)
Northern Mariana Islands	0 (0-0)	2.08 (0.79-3.87)	1 (0-2)	2.25 (0.88-3.93)	2.49 (1.26-3.74)
Norway	308 (106-586)	3.95 (1.39-7.53)	134 (44-261)	1.05 (0.36-2.02)	-4.19 (-5.17--3.2)
Oman	49 (22-86)	9.5 (4.14-16.81)	78 (32-135)	6.34 (2.45-10.98)	-0.95 (-2.66-0.79)
Pakistan	1256 (496-2104)	2.63 (1-4.61)	3353 (1393-5783)	3.53 (1.36-6.14)	0.73 (-0.48-1.96)
Palau	0 (0-1)	3.95 (1.59-7.72)	1 (0-1)	3.53 (1.32-6.56)	0.75 (0.15-1.35)
Palestine	66 (27-110)	9.57 (3.92-16.6)	111 (46-186)	6.63 (2.59-11.41)	-1.31 (-2.98-0.39)
Panama	14 (5-28)	1.11 (0.38-2.19)	27 (9-56)	0.58 (0.2-1.19)	-0.73 (-1.19--0.27)
Papua New Guinea	32 (13-58)	2.04 (0.81-3.67)	90 (33-158)	2.03 (0.73-3.82)	0.08 (-1.19-1.38)
Paraguay	21 (7-41)	1.09 (0.37-2.23)	44 (15-88)	0.83 (0.29-1.7)	0.24 (-0.51-1.01)
Peru	108 (40-218)	1.05 (0.39-2.14)	202 (73-420)	0.6 (0.22-1.23)	-1.05 (-1.74--0.36)
Philippines	321 (119-597)	1.79 (0.59-3.54)	936 (387-1660)	1.54 (0.59-2.91)	0.48 (-0.77-1.75)
Poland	2653 (1098-4583)	6.8 (2.71-11.91)	2766 (1151-4914)	3.43 (1.44-6.07)	-1.24 (-1.78--0.69)
Portugal	380 (143-695)	3.24 (1.19-6.17)	324 (114-644)	0.99 (0.36-1.89)	-2.75 (-3.66--1.83)
Puerto Rico	116 (46-216)	3.64 (1.42-6.77)	83 (31-159)	0.87 (0.33-1.64)	-3.31 (-4.06--2.55)
Qatar	8 (3-13)	13.91 (5.39-23.47)	20 (8-35)	4.72 (1.87-8.33)	-4.31 (-6.89--1.65)
Republic of Korea	232 (86-434)	1.41 (0.47-2.94)	618 (199-1245)	0.7 (0.22-1.42)	-0.45 (-1.2-0.31)
Republic of Moldova	267 (103-469)	9.3 (3.43-17.41)	296 (105-552)	4.84 (1.73-8.94)	-1.12 (-1.59--0.65)
Romania	1281 (545-2211)	6.21 (2.54-11.22)	1513 (598-2764)	3.56 (1.42-6.4)	-0.71 (-1.28--0.14)
Russian Federation	10625 (4339-18595)	7.74 (3.13-14.06)	12936 (5152-22338)	5.27 (2.08-9.18)	-0.43 (-0.87-0.01)
Rwanda	13 (5-26)	0.67 (0.24-1.37)	20 (7-40)	0.5 (0.16-1.08)	-1.66 (-3.44-0.15)
Saint Kitts and Nevis	2 (1-3)	4.64 (1.87-8.37)	1 (0-2)	2.02 (0.68-3.99)	-2.55 (-2.95--2.14)
Saint Lucia	2 (1-4)	3.21 (1.02-6.75)	2 (1-4)	0.93 (0.32-1.83)	-3.12 (-3.86--2.38)
Saint Vincent and the Grenadines	2 (1-4)	3.9 (1.33-7.7)	3 (1-5)	2.15 (0.73-4.33)	-1.01 (-1.54--0.49)
Samoa	5 (2-8)	6.35 (2.64-11.08)	9 (4-15)	6.79 (2.67-12)	0.87 (-0.02-1.76)
San Marino	1 (0-1)	1.78 (0.58-3.62)	1 (0-1)	0.56 (0.19-1.11)	-2.11 (-3.4--0.81)
Sao Tome and Principe	0 (0-1)	0.74 (0.25-1.61)	1 (0-1)	0.89 (0.31-1.76)	0.4 (-0.89-1.71)
Saudi Arabia	379 (157-657)	8.61 (3.53-15.59)	959 (379-1570)	7.29 (2.96-12.57)	-0.36 (-2.02-1.33)
Senegal	49 (21-85)	1.88 (0.73-3.27)	116 (45-220)	1.9 (0.72-3.75)	0.1 (-1.27-1.48)
Serbia	510 (199-913)	7.14 (2.77-12.98)	734 (242-1374)	4.21 (1.38-7.89)	-0.57 (-1.15-0.02)
Seychelles	1 (1-3)	2.62 (1.03-5.01)	2 (1-3)	2.04 (0.69-3.93)	-0.5 (-0.85--0.15)
Sierra Leone	27 (11-50)	1.64 (0.62-3.09)	50 (21-87)	1.76 (0.71-3.3)	-0.12 (-1.49-1.27)
Singapore	38 (16-67)	1.98 (0.81-3.79)	49 (19-91)	0.59 (0.22-1.13)	-2.94 (-3.38--2.51)
Slovakia	306 (113-529)	5.56 (1.98-9.83)	363 (123-705)	3.88 (1.31-7.51)	-0.15 (-0.58-0.27)
Slovenia	64 (26-119)	2.69 (1.06-5.03)	59 (20-107)	1 (0.35-1.81)	-2.34 (-3.15--1.52)
Solomon Islands	6 (3-11)	5.4 (2.22-9.61)	16 (7-28)	5.4 (2.21-9.53)	0.41 (-0.92-1.76)
Somalia	6 (2-13)	0.42 (0.15-0.82)	18 (6-35)	0.47 (0.16-0.98)	0.23 (-2.01-2.51)
South Africa	587 (249-1002)	3.38 (1.39-5.91)	1299 (566-2097)	3.65 (1.53-6.05)	0.45 (-0.45-1.36)
South Sudan	8 (3-16)	0.42 (0.15-0.85)	13 (5-25)	0.47 (0.16-0.94)	-0.07 (-1.78-1.67)
Spain	1285 (480-2433)	2.46 (0.92-4.66)	1186 (412-2332)	0.86 (0.32-1.63)	-2.38 (-3.38--1.38)
Sri Lanka	57 (22-105)	0.7 (0.26-1.45)	134 (47-261)	0.57 (0.2-1.17)	1.06 (0.47-1.66)
Sudan	2225 (995-3546)	25.33 (11.35-41.4)	3347 (1455-5820)	18.1 (7.94-32.14)	-1.34 (-2.48--0.18)
Suriname	8 (3-15)	3.39 (1.32-6.46)	11 (5-19)	1.83 (0.75-3.34)	-0.9 (-1.43--0.37)
Sweden	524 (198-1017)	3.03 (1.15-5.85)	255 (89-490)	0.88 (0.32-1.67)	-3.61 (-4.79--2.42)
Switzerland	375 (131-743)	3.22 (1.15-6.39)	242 (77-506)	0.93 (0.3-1.89)	-3.43 (-4.51--2.34)
Syrian Arab Republic	494 (205-823)	11.84 (4.68-20.09)	1094 (477-1992)	11.78 (5.16-21.57)	0.88 (-0.65-2.43)
Taiwan (Province of China)	172 (72-299)	1.54 (0.59-2.88)	316 (125-574)	0.71 (0.28-1.28)	-0.44 (-0.99-0.1)
Tajikistan	128 (48-229)	5.72 (2.1-10.33)	166 (69-319)	5 (2-9.73)	-1.08 (-2.52-0.38)
Thailand	435 (163-803)	1.93 (0.71-3.65)	1080 (381-2070)	0.99 (0.35-1.89)	-0.56 (-1.28-0.16)
Timor-Leste	1 (1-3)	0.77 (0.27-1.62)	5 (2-11)	0.85 (0.28-1.83)	1.79 (0.22-3.39)
Togo	7 (3-13)	0.83 (0.29-1.77)	21 (8-40)	0.92 (0.31-1.86)	0.42 (-1.52-2.4)
Tokelau	0 (0-0)	3.65 (1.32-6.53)	0 (0-0)	3.15 (1.14-5.8)	0.14 (-0.08-0.37)
Tonga	1 (0-2)	2.18 (0.87-3.78)	2 (1-3)	2.28 (0.89-4.08)	0.98 (0.29-1.67)
Trinidad and Tobago	46 (19-76)	6.65 (2.69-11.89)	58 (24-103)	3.05 (1.26-5.51)	-1.68 (-2.09--1.27)
Tunisia	178 (61-324)	5.76 (1.98-10.69)	489 (188-928)	4.53 (1.7-8.75)	0.46 (-0.35-1.27)
Turkey	1671 (656-2805)	6.4 (2.47-11.02)	3844 (1549-6889)	4.84 (1.95-8.83)	0.84 (0.16-1.52)
Turkmenistan	106 (41-187)	8.02 (3.05-14.47)	204 (75-372)	7.2 (2.69-13.37)	-0.46 (-1.67-0.77)
Tuvalu	0 (0-0)	4.69 (1.82-8.26)	0 (0-1)	4.13 (1.53-7.36)	-0.08 (-0.63-0.47)
Uganda	21 (8-41)	0.45 (0.17-0.95)	50 (18-97)	0.49 (0.16-1)	-0.57 (-2.54-1.44)
Ukraine	3119 (1087-6000)	5.28 (1.83-10.37)	4864 (1507-10213)	6.01 (1.9-12.45)	0.75 (0.21-1.29)
United Arab Emirates	23 (10-40)	8.09 (3.29-14.77)	80 (29-138)	5.6 (2.05-10.36)	-0.48 (-3.4-2.52)
United Kingdom	11482 (4718-18967)	11.98 (4.98-19.66)	4966 (2064-8027)	3.23 (1.35-5.19)	-4.11 (-4.99--3.23)
United Republic of Tanzania	11 (4-20)	0.13 (0.04-0.28)	34 (12-68)	0.17 (0.06-0.36)	0.68 (-0.85-2.23)
United States of America	11851 (4228-23161)	3.5 (1.25-6.84)	10519 (3833-19441)	1.59 (0.6-2.9)	-2.31 (-2.99--1.63)
United States Virgin Islands	2 (1-4)	4.57 (1.57-8.79)	3 (1-6)	1.97 (0.67-3.93)	-0.45 (-1-0.1)
Uruguay	64 (22-132)	1.68 (0.59-3.55)	45 (15-94)	0.68 (0.25-1.35)	-2.21 (-2.83--1.59)
Uzbekistan	313 (114-634)	3.19 (1.12-6.53)	563 (215-1097)	3.36 (1.18-6.66)	0.23 (-0.89-1.36)
Vanuatu	0 (0-1)	1.27 (0.48-2.56)	1 (1-3)	1.28 (0.47-2.58)	0.32 (-1.33-2.01)
Venezuela (Bolivarian Republic of)	136 (54-253)	1.72 (0.63-3.33)	388 (138-744)	1.42 (0.5-2.74)	0.46 (-0.29-1.21)
Viet Nam	188 (67-391)	0.56 (0.19-1.21)	530 (186-1092)	0.67 (0.22-1.43)	1.89 (1.13-2.66)
Yemen	368 (147-668)	10.36 (4-18.84)	906 (355-1611)	8.7 (3.27-14.79)	-0.44 (-2.15-1.29)
Zambia	11 (4-20)	0.52 (0.19-1.02)	38 (14-71)	0.77 (0.29-1.51)	1.19 (-0.66-3.06)
Zimbabwe	31 (12-58)	1.32 (0.46-2.74)	70 (27-127)	1.77 (0.66-3.51)	1.64 (-0.28-3.6)
Abbreviations:EAPC: Estimated Annual Percentage Change; UI: Uncertainty Interval; CI: Confidence Interval
Appendix Table 7 YLDs of IHD due to insufficient physical activity in middle-aged and elderly populations by countries from 1990 to 2021: Age-standardized rates and case numbers.
	Rate Per 100 000(95%UI)
	1990		2021
location name	Num 95%UI	ASR 95%UI	Num 95%UI	ASR 95%UI	EAPC 95%CI
Afghanistan	87 (35-159)	1.39 (0.55-2.53)	135 (55-231)	1.55 (0.62-2.72)	-0.94 (-2.27-0.4)
Albania	19 (8-35)	1.06 (0.44-1.9)	46 (18-89)	1.04 (0.41-1.97)	1.96 (1.46-2.46)
Algeria	191 (77-358)	1.71 (0.69-3.22)	627 (253-1114)	1.85 (0.72-3.3)	1 (0.19-1.81)
American Samoa	0 (0-1)	1.93 (0.86-3.45)	1 (0-2)	2.08 (0.85-3.93)	1.44 (0.73-2.15)
Andorra	0 (0-1)	0.78 (0.28-1.48)	1 (0-2)	0.68 (0.26-1.3)	0.12 (-0.41-0.65)
Angola	9 (4-18)	0.33 (0.12-0.64)	30 (11-56)	0.34 (0.13-0.64)	0.13 (-1.67-1.95)
Antigua and Barbuda	0 (0-1)	0.81 (0.31-1.54)	1 (0-2)	0.78 (0.27-1.49)	-0.02 (-0.27-0.23)
Argentina	61 (24-112)	0.2 (0.08-0.38)	90 (33-181)	0.16 (0.06-0.31)	-0.63 (-0.85--0.4)
Armenia	22 (8-41)	0.96 (0.36-1.83)	47 (17-86)	1.07 (0.39-2.01)	1.97 (1.57-2.38)
Australia	286 (114-569)	1.47 (0.58-2.92)	491 (201-908)	1.02 (0.42-1.87)	-1.08 (-1.67--0.49)
Austria	150 (53-299)	1.17 (0.43-2.32)	169 (59-333)	0.81 (0.28-1.58)	-1.26 (-2.17--0.35)
Azerbaijan	41 (15-73)	0.99 (0.37-1.8)	79 (30-151)	1.02 (0.39-1.99)	0.67 (0.02-1.34)
Bahamas	1 (0-2)	0.79 (0.3-1.57)	3 (1-6)	0.85 (0.31-1.67)	0.95 (0.42-1.49)
Bahrain	4 (1-6)	2.23 (0.88-4.02)	18 (7-32)	2.11 (0.85-3.71)	0.42 (-0.91-1.78)
Bangladesh	218 (85-404)	0.51 (0.2-0.98)	878 (354-1645)	0.66 (0.27-1.23)	2.28 (1.23-3.34)
Barbados	5 (2-9)	1.67 (0.67-3.02)	9 (4-17)	1.72 (0.7-3.19)	0.58 (0.13-1.03)
Belarus	157 (64-302)	1.26 (0.51-2.41)	230 (93-450)	1.39 (0.55-2.69)	1.17 (0.61-1.73)
Belgium	156 (59-301)	0.96 (0.37-1.82)	174 (68-326)	0.66 (0.27-1.23)	-0.85 (-1.76-0.07)
Belize	1 (0-1)	0.75 (0.29-1.39)	2 (1-4)	0.75 (0.27-1.41)	0.1 (-0.81-1.01)
Benin	2 (1-4)	0.12 (0.04-0.25)	7 (2-15)	0.16 (0.06-0.35)	0.75 (-0.78-2.31)
Bermuda	1 (0-1)	1.14 (0.45-2.16)	2 (1-3)	1.04 (0.4-2.01)	1.04 (0.45-1.63)
Bhutan	6 (2-11)	2.74 (1.13-4.85)	19 (8-32)	3.24 (1.3-5.49)	1.8 (0.93-2.69)
Bolivia (Plurinational State of)	10 (4-20)	0.39 (0.12-0.78)	34 (13-68)	0.42 (0.15-0.86)	1.2 (0.31-2.1)
Bosnia and Herzegovina	36 (14-69)	0.99 (0.38-1.9)	70 (26-134)	1.08 (0.41-2.05)	1.66 (1.11-2.22)
Botswana	5 (2-9)	1.03 (0.4-1.81)	16 (7-30)	1.28 (0.53-2.43)	1.32 (0.12-2.53)
Brazil	1012 (400-1894)	1.33 (0.54-2.44)	3197 (1163-5858)	1.31 (0.48-2.38)	1.23 (0.7-1.76)
Brunei Darussalam	0 (0-1)	0.44 (0.17-0.85)	1 (0-2)	0.33 (0.12-0.65)	-0.16 (-1.2-0.89)
Bulgaria	97 (37-186)	0.86 (0.33-1.6)	130 (49-243)	0.85 (0.33-1.61)	0.54 (-0.27-1.35)
Burkina Faso	9 (3-18)	0.24 (0.08-0.46)	22 (8-44)	0.27 (0.1-0.54)	0.13 (-1.2-1.48)
Burundi	4 (1-8)	0.2 (0.07-0.37)	8 (3-17)	0.2 (0.07-0.41)	-0.26 (-1.78-1.28)
Cabo Verde	1 (0-1)	0.22 (0.08-0.4)	1 (0-2)	0.3 (0.11-0.57)	1.38 (0.83-1.94)
Cambodia	4 (2-9)	0.14 (0.05-0.31)	13 (5-27)	0.15 (0.05-0.32)	0.96 (-0.41-2.34)
Cameroon	10 (4-19)	0.25 (0.09-0.49)	39 (14-74)	0.36 (0.12-0.66)	0.94 (-0.49-2.4)
Canada	123 (41-259)	0.38 (0.12-0.8)	257 (81-581)	0.32 (0.1-0.7)	0.43 (-0.27-1.13)
Central African Republic	2 (1-3)	0.21 (0.08-0.4)	4 (1-7)	0.23 (0.07-0.44)	0.12 (-1.53-1.81)
Chad	7 (3-15)	0.28 (0.1-0.55)	18 (6-33)	0.34 (0.12-0.63)	0.05 (-1.38-1.5)
Chile	25 (9-50)	0.27 (0.1-0.55)	56 (21-113)	0.22 (0.08-0.43)	-0.12 (-0.43-0.19)
China	5151 (2053-9627)	0.78 (0.3-1.45)	19957 (8161-36553)	1 (0.42-1.86)	2.41 (1.96-2.85)
Colombia	121 (47-225)	0.71 (0.27-1.32)	533 (211-937)	0.96 (0.38-1.68)	2.71 (2.16-3.27)
Comoros	0 (0-1)	0.19 (0.07-0.37)	1 (0-2)	0.23 (0.08-0.45)	1.49 (0.44-2.55)
Congo	2 (1-4)	0.22 (0.08-0.43)	6 (2-10)	0.25 (0.08-0.46)	0.65 (-0.71-2.02)
Cook Islands	0 (0-0)	0.57 (0.21-1.1)	0 (0-0)	0.73 (0.3-1.4)	2.17 (1.82-2.52)
Costa Rica	8 (3-15)	0.45 (0.17-0.88)	25 (9-47)	0.46 (0.17-0.85)	1.29 (0.79-1.8)
C么te d'Ivoire	10 (4-19)	0.3 (0.11-0.57)	39 (16-74)	0.4 (0.15-0.77)	1.42 (-0.2-3.07)
Croatia	75 (28-139)	1.36 (0.51-2.51)	121 (46-223)	1.23 (0.48-2.24)	0.83 (0.04-1.63)
Cuba	110 (39-215)	1.09 (0.39-2.16)	181 (69-336)	0.89 (0.34-1.63)	0.34 (-0.1-0.77)
Cyprus	5 (2-11)	0.71 (0.27-1.33)	15 (5-28)	0.68 (0.24-1.29)	0.1 (-0.23-0.42)
Czechia	288 (103-521)	2.07 (0.75-3.7)	430 (183-841)	1.82 (0.77-3.45)	0.96 (0.22-1.7)
Democratic People's Republic of Korea	71 (27-135)	0.57 (0.2-1.13)	187 (78-361)	0.63 (0.25-1.23)	1.32 (0.9-1.73)
Democratic Republic of the Congo	53 (18-104)	0.49 (0.17-1.02)	124 (47-225)	0.47 (0.18-0.89)	-0.3 (-1.97-1.39)
Denmark	77 (29-148)	0.88 (0.34-1.66)	77 (30-159)	0.58 (0.22-1.16)	-1.3 (-2.16--0.44)
Djibouti	0 (0-0)	0.23 (0.07-0.47)	1 (0-3)	0.28 (0.09-0.52)	1.54 (-0.03-3.14)
Dominica	0 (0-1)	0.49 (0.17-0.99)	0 (0-1)	0.48 (0.19-0.93)	0.3 (0.15-0.46)
Dominican Republic	25 (10-49)	0.76 (0.28-1.48)	86 (34-159)	0.88 (0.35-1.64)	1.59 (0.97-2.21)
Ecuador	12 (5-24)	0.24 (0.09-0.5)	49 (18-95)	0.3 (0.11-0.59)	1.59 (0.98-2.21)
Egypt	298 (123-530)	1.19 (0.49-2.11)	794 (325-1470)	1.38 (0.55-2.57)	0.61 (-0.38-1.6)
El Salvador	11 (4-22)	0.4 (0.14-0.77)	31 (10-63)	0.47 (0.16-0.92)	1.55 (1.07-2.04)
Equatorial Guinea	0 (0-1)	0.27 (0.1-0.51)	2 (1-3)	0.38 (0.14-0.74)	0.95 (-0.78-2.7)
Eritrea	1 (0-1)	0.08 (0.03-0.15)	2 (1-4)	0.09 (0.03-0.17)	1.03 (-0.63-2.72)
Estonia	25 (9-51)	1.24 (0.45-2.44)	33 (12-63)	1.03 (0.37-1.94)	-0.06 (-0.87-0.77)
Eswatini	1 (1-3)	0.56 (0.22-1.09)	3 (1-6)	0.66 (0.27-1.21)	1.09 (-0.42-2.62)
Ethiopia	33 (11-63)	0.19 (0.06-0.37)	92 (35-173)	0.23 (0.08-0.44)	0.93 (-0.55-2.43)
Fiji	3 (1-5)	0.8 (0.32-1.43)	6 (2-12)	0.89 (0.34-1.76)	1.36 (0.58-2.15)
Finland	94 (36-184)	1.28 (0.48-2.47)	125 (49-229)	0.84 (0.34-1.53)	-0.56 (-1.49-0.39)
France	1245 (454-2379)	1.37 (0.52-2.62)	1847 (699-3619)	1.1 (0.43-2.12)	-0.59 (-1.5-0.33)
Gabon	1 (0-1)	0.13 (0.05-0.28)	1 (0-2)	0.15 (0.05-0.31)	0.23 (-0.88-1.35)
Gambia	1 (0-1)	0.23 (0.09-0.44)	3 (1-5)	0.29 (0.11-0.55)	1.06 (-0.37-2.52)
Georgia	70 (27-130)	1.23 (0.47-2.29)	60 (22-116)	0.93 (0.36-1.81)	-0.48 (-1.08-0.12)
Germany	1160 (433-2250)	0.86 (0.32-1.67)	1263 (422-2636)	0.55 (0.2-1.07)	-0.61 (-1.64-0.42)
Ghana	20 (7-37)	0.4 (0.15-0.71)	68 (27-124)	0.49 (0.19-0.92)	0.94 (-0.44-2.35)
Greece	94 (36-178)	0.61 (0.23-1.16)	119 (40-235)	0.41 (0.14-0.77)	-0.92 (-1.89-0.06)
Greenland	0 (0-0)	0.43 (0.14-0.94)	0 (0-0)	0.35 (0.12-0.74)	0.61 (-0.22-1.45)
Grenada	1 (0-1)	0.68 (0.25-1.33)	1 (0-1)	0.68 (0.26-1.32)	0.02 (-0.31-0.36)
Guam	0 (0-1)	0.45 (0.16-0.89)	1 (0-3)	0.61 (0.22-1.21)	2.91 (2.27-3.55)
Guatemala	5 (2-9)	0.19 (0.07-0.37)	21 (8-44)	0.21 (0.07-0.46)	1.89 (0.61-3.19)
Guinea	4 (1-7)	0.12 (0.04-0.25)	8 (3-14)	0.16 (0.06-0.32)	0.34 (-0.75-1.45)
Guinea-Bissau	1 (0-2)	0.31 (0.11-0.64)	2 (1-5)	0.4 (0.15-0.76)	0.66 (-0.97-2.32)
Guyana	2 (1-4)	0.65 (0.23-1.25)	4 (1-8)	0.73 (0.25-1.43)	1.26 (0.4-2.13)
Haiti	18 (6-35)	0.68 (0.25-1.33)	45 (16-88)	0.75 (0.27-1.47)	0.55 (-0.6-1.71)
Honduras	6 (2-12)	0.33 (0.12-0.69)	20 (8-39)	0.36 (0.13-0.71)	0.88 (-0.21-1.99)
Hungary	219 (82-426)	1.48 (0.56-2.89)	252 (93-486)	1.18 (0.44-2.27)	-0.04 (-0.81-0.74)
Iceland	2 (1-4)	0.67 (0.26-1.29)	4 (1-6)	0.58 (0.22-1.04)	-0.25 (-0.74-0.24)
India	4218 (1673-7793)	1.15 (0.46-2.05)	14045 (5607-24838)	1.34 (0.54-2.42)	1.39 (0.54-2.24)
Indonesia	1806 (724-3197)	2.3 (0.92-4.05)	5059 (2044-8856)	2.57 (1.04-4.59)	1.13 (0.27-1.99)
Iran (Islamic Republic of)	360 (138-632)	1.53 (0.57-2.71)	1218 (509-2170)	1.61 (0.68-2.85)	1.41 (0.63-2.2)
Iraq	177 (72-306)	2.28 (0.93-4)	621 (251-1067)	2.68 (1.08-4.76)	1.1 (0-2.2)
Ireland	56 (21-103)	1.34 (0.51-2.5)	89 (34-173)	1.06 (0.41-2.04)	-0.63 (-1.03--0.22)
Israel	41 (15-78)	0.84 (0.31-1.58)	88 (32-164)	0.67 (0.24-1.23)	-0.62 (-0.85--0.39)
Italy	1118 (428-2115)	1.21 (0.47-2.28)	1537 (587-2831)	0.94 (0.36-1.71)	-0.15 (-1.21-0.92)
Jamaica	22 (8-40)	1.2 (0.44-2.24)	45 (18-80)	1.42 (0.58-2.57)	0.96 (0.76-1.16)
Japan	1196 (481-2137)	0.72 (0.29-1.28)	1781 (656-3324)	0.52 (0.2-0.94)	-0.19 (-1.14-0.77)
Jordan	18 (7-35)	1.5 (0.57-2.9)	111 (41-198)	1.63 (0.58-2.96)	0.96 (-0.33-2.28)
Kazakhstan	121 (45-229)	1.06 (0.39-2.02)	176 (67-342)	1.1 (0.42-2.19)	0.26 (-0.11-0.63)
Kenya	40 (15-72)	0.5 (0.19-0.91)	128 (49-249)	0.58 (0.21-1.09)	0.75 (-0.61-2.14)
Kiribati	0 (0-1)	1.34 (0.55-2.44)	1 (0-2)	1.38 (0.53-2.65)	0.41 (-0.53-1.36)
Kuwait	26 (11-49)	3.93 (1.67-7.1)	140 (60-250)	4.17 (1.84-7.41)	0.9 (0.02-1.79)
Kyrgyzstan	27 (11-51)	1.03 (0.41-1.98)	35 (14-67)	0.96 (0.37-1.85)	-0.32 (-1.13-0.49)
Lao People's Democratic Republic	3 (1-6)	0.2 (0.07-0.41)	7 (3-14)	0.2 (0.07-0.38)	0.33 (-0.89-1.57)
Latvia	44 (17-84)	1.24 (0.47-2.37)	50 (18-96)	1.13 (0.42-2.08)	0.4 (-0.42-1.23)
Lebanon	34 (14-64)	1.69 (0.67-3.19)	120 (47-211)	1.95 (0.76-3.38)	1.35 (1.08-1.62)
Lesotho	1 (0-3)	0.22 (0.07-0.45)	2 (1-3)	0.24 (0.08-0.49)	-0.19 (-1.44-1.06)
Liberia	5 (2-10)	0.48 (0.19-0.94)	13 (5-25)	0.64 (0.26-1.22)	0.39 (-0.8-1.6)
Libya	33 (13-61)	1.89 (0.76-3.48)	101 (38-180)	2.07 (0.78-3.7)	1.05 (0.12-1.99)
Lithuania	76 (30-140)	1.69 (0.65-3.09)	112 (39-211)	1.69 (0.59-3.2)	1.28 (0.49-2.08)
Luxembourg	5 (2-9)	0.86 (0.31-1.55)	8 (3-17)	0.73 (0.29-1.47)	-0.78 (-1.43--0.12)
Madagascar	9 (3-18)	0.2 (0.07-0.4)	21 (8-43)	0.23 (0.08-0.47)	0.22 (-1.35-1.81)
Malawi	7 (2-14)	0.2 (0.07-0.4)	16 (6-32)	0.23 (0.08-0.46)	0.26 (-1.18-1.72)
Malaysia	84 (33-159)	1.01 (0.39-1.89)	353 (138-682)	1.33 (0.52-2.56)	2.32 (1.48-3.18)
Maldives	2 (1-4)	2.96 (1.21-5.31)	9 (4-16)	2.95 (1.15-5.14)	0.72 (-0.28-1.74)
Mali	11 (4-21)	0.3 (0.12-0.59)	31 (12-61)	0.39 (0.16-0.75)	0.64 (-0.73-2.03)
Malta	6 (2-10)	1.34 (0.51-2.55)	13 (5-24)	1.22 (0.47-2.18)	0.99 (0.29-1.7)
Marshall Islands	0 (0-1)	2.25 (0.96-3.92)	1 (0-2)	2.33 (0.99-4.29)	1.1 (-0.06-2.27)
Mauritania	9 (3-17)	0.91 (0.35-1.73)	25 (10-48)	1.19 (0.46-2.22)	1.03 (-0.03-2.09)
Mauritius	3 (1-6)	0.53 (0.21-1.08)	9 (4-19)	0.51 (0.2-1.04)	1.09 (0.63-1.56)
Mexico	193 (70-352)	0.51 (0.18-0.93)	628 (242-1149)	0.53 (0.2-0.96)	1.16 (0.33-2)
Micronesia (Federated States of)	1 (0-2)	2.49 (1.03-4.41)	2 (1-3)	2.62 (1.03-4.54)	1 (0.1-1.9)
Monaco	1 (0-1)	0.83 (0.31-1.66)	1 (0-2)	0.73 (0.27-1.42)	-0.75 (-2.11-0.64)
Mongolia	4 (1-8)	0.44 (0.17-0.94)	8 (3-15)	0.46 (0.17-0.88)	0.45 (-0.77-1.7)
Montenegro	8 (3-15)	1.34 (0.5-2.43)	13 (5-26)	1.38 (0.53-2.6)	1.05 (0.65-1.46)
Morocco	263 (104-494)	1.96 (0.78-3.76)	701 (285-1253)	2.15 (0.87-3.88)	0.97 (0.35-1.59)
Mozambique	11 (4-21)	0.21 (0.07-0.41)	23 (9-45)	0.24 (0.09-0.48)	0.09 (-1.36-1.57)
Myanmar	20 (8-40)	0.11 (0.04-0.21)	52 (20-102)	0.12 (0.04-0.25)	1.37 (0.58-2.17)
Namibia	4 (1-7)	0.68 (0.24-1.27)	8 (3-14)	0.7 (0.26-1.29)	0.41 (-0.79-1.63)
Nauru	0 (0-0)	0.7 (0.27-1.37)	0 (0-0)	0.86 (0.34-1.69)	0.76 (-0.33-1.87)
Nepal	30 (11-59)	0.4 (0.14-0.79)	96 (34-187)	0.46 (0.17-0.91)	1.48 (0.47-2.5)
Netherlands	122 (45-237)	0.58 (0.22-1.12)	154 (54-303)	0.4 (0.14-0.77)	-1.08 (-1.84--0.31)
New Zealand	42 (16-83)	1.05 (0.4-2.09)	86 (35-161)	0.94 (0.38-1.74)	0.02 (-0.52-0.56)
Nicaragua	5 (2-10)	0.38 (0.13-0.76)	18 (6-35)	0.4 (0.14-0.78)	1.22 (0.21-2.24)
Niger	7 (2-13)	0.28 (0.1-0.55)	24 (9-45)	0.34 (0.14-0.65)	0.61 (-1.07-2.32)
Nigeria	151 (57-283)	0.37 (0.14-0.68)	434 (164-775)	0.52 (0.2-0.96)	0.88 (-0.42-2.19)
Niue	0 (0-0)	0.79 (0.31-1.51)	0 (0-0)	0.84 (0.33-1.6)	0.66 (0.39-0.92)
North Macedonia	18 (7-34)	1.06 (0.4-1.99)	33 (11-63)	1.05 (0.39-2.05)	0.78 (0.51-1.04)
Northern Mariana Islands	0 (0-0)	0.77 (0.29-1.41)	0 (0-1)	0.87 (0.35-1.62)	2.37 (1.36-3.39)
Norway	70 (25-139)	0.94 (0.36-1.86)	81 (30-156)	0.74 (0.28-1.4)	-0.83 (-1.65-0)
Oman	9 (4-17)	1.54 (0.65-2.89)	37 (15-65)	1.98 (0.76-3.63)	1.36 (-0.1-2.83)
Pakistan	497 (185-891)	0.96 (0.36-1.73)	1155 (453-2099)	1.06 (0.4-1.97)	0.38 (-0.71-1.47)
Palau	0 (0-0)	0.76 (0.29-1.39)	0 (0-0)	0.81 (0.33-1.53)	1.33 (0.87-1.79)
Palestine	15 (6-27)	1.81 (0.74-3.16)	48 (20-83)	1.93 (0.8-3.42)	0.39 (-0.86-1.66)
Panama	6 (2-12)	0.43 (0.15-0.87)	19 (7-37)	0.43 (0.16-0.82)	0.88 (0.47-1.29)
Papua New Guinea	9 (4-17)	0.54 (0.21-1.02)	28 (11-50)	0.58 (0.21-1.03)	0.37 (-0.81-1.57)
Paraguay	9 (3-17)	0.42 (0.15-0.82)	23 (9-46)	0.43 (0.16-0.83)	0.72 (0.04-1.41)
Peru	50 (17-99)	0.46 (0.16-0.92)	174 (66-334)	0.53 (0.2-1.02)	1.6 (1.02-2.19)
Philippines	90 (34-175)	0.36 (0.13-0.74)	281 (115-511)	0.4 (0.16-0.74)	0.81 (-0.22-1.86)
Poland	874 (345-1549)	2.06 (0.83-3.64)	1598 (631-2919)	2.09 (0.82-3.83)	0.98 (0.41-1.56)
Portugal	115 (45-217)	0.84 (0.33-1.56)	219 (81-425)	0.78 (0.3-1.5)	0.32 (-0.58-1.22)
Puerto Rico	40 (15-71)	1.12 (0.41-1.94)	71 (26-132)	0.89 (0.35-1.65)	0.32 (-0.32-0.97)
Qatar	3 (1-5)	2.55 (1.02-4.55)	28 (11-49)	2.57 (1.05-4.5)	0.1 (-1.45-1.67)
Republic of Korea	98 (39-185)	0.39 (0.15-0.76)	400 (149-758)	0.43 (0.16-0.82)	1.85 (1.36-2.35)
Republic of Moldova	39 (15-71)	1.08 (0.41-1.97)	64 (24-124)	1.06 (0.4-2.02)	1.09 (0.71-1.47)
Romania	324 (122-624)	1.21 (0.46-2.24)	469 (180-901)	1.18 (0.46-2.23)	0.76 (0.1-1.41)
Russian Federation	2137 (783-3765)	1.33 (0.47-2.33)	3300 (1243-5947)	1.33 (0.51-2.4)	0.7 (0.26-1.14)
Rwanda	4 (1-8)	0.18 (0.06-0.35)	11 (4-21)	0.2 (0.07-0.39)	0.8 (-0.72-2.34)
Saint Kitts and Nevis	0 (0-1)	0.87 (0.36-1.65)	1 (0-1)	0.84 (0.3-1.64)	-0.33 (-0.58--0.08)
Saint Lucia	1 (0-1)	0.78 (0.29-1.49)	2 (1-3)	0.74 (0.29-1.4)	0.9 (0.49-1.3)
Saint Vincent and the Grenadines	1 (0-1)	0.76 (0.28-1.5)	1 (0-2)	0.71 (0.24-1.37)	0.73 (0.37-1.09)
Samoa	1 (1-2)	1.51 (0.63-2.77)	2 (1-4)	1.59 (0.62-2.9)	0.67 (-0.08-1.43)
San Marino	0 (0-1)	0.76 (0.27-1.42)	1 (0-1)	0.7 (0.26-1.35)	0.13 (-0.86-1.13)
Sao Tome and Principe	0 (0-0)	0.18 (0.07-0.38)	0 (0-0)	0.23 (0.08-0.48)	0.55 (-0.57-1.68)
Saudi Arabia	93 (38-171)	1.83 (0.74-3.48)	427 (168-770)	2.54 (1.01-4.54)	1.59 (0.17-3.03)
Senegal	15 (6-29)	0.5 (0.19-0.94)	43 (17-82)	0.6 (0.23-1.13)	0.91 (-0.28-2.12)
Serbia	116 (45-221)	1.16 (0.45-2.21)	202 (75-377)	1.16 (0.43-2.14)	0.84 (0.25-1.43)
Seychelles	0 (0-1)	0.56 (0.22-1.07)	1 (0-1)	0.62 (0.22-1.22)	0.42 (0.13-0.7)
Sierra Leone	7 (3-12)	0.37 (0.14-0.67)	14 (5-26)	0.41 (0.16-0.79)	-0.11 (-1.31-1.1)
Singapore	9 (4-17)	0.42 (0.17-0.82)	28 (12-53)	0.33 (0.13-0.61)	0.01 (-0.34-0.37)
Slovakia	68 (26-129)	1.16 (0.45-2.15)	103 (38-198)	1.05 (0.4-2.03)	0.79 (0.32-1.27)
Slovenia	29 (12-54)	1.17 (0.46-2.2)	51 (19-98)	1.07 (0.4-2.01)	0.62 (-0.14-1.39)
Solomon Islands	1 (0-2)	0.86 (0.35-1.62)	3 (1-6)	0.98 (0.37-1.85)	0.72 (-0.48-1.93)
Somalia	4 (1-7)	0.19 (0.07-0.39)	11 (4-20)	0.22 (0.08-0.42)	0.25 (-1.66-2.19)
South Africa	346 (142-620)	1.82 (0.74-3.33)	696 (283-1220)	1.64 (0.69-2.96)	0.03 (-0.72-0.78)
South Sudan	4 (1-8)	0.18 (0.07-0.37)	7 (2-13)	0.21 (0.07-0.43)	0.24 (-1.29-1.79)
Spain	474 (182-934)	0.84 (0.33-1.66)	776 (280-1469)	0.7 (0.26-1.27)	-0.36 (-1.25-0.55)
Sri Lanka	18 (7-34)	0.19 (0.07-0.37)	65 (23-120)	0.25 (0.09-0.45)	2.27 (1.82-2.73)
Sudan	456 (199-771)	4.74 (2.04-8.06)	1191 (523-2070)	5.55 (2.4-9.66)	0.51 (-0.53-1.56)
Suriname	2 (1-5)	1 (0.41-1.9)	7 (3-13)	1.07 (0.4-1.99)	0.99 (0.58-1.4)
Sweden	158 (59-307)	0.95 (0.36-1.81)	209 (82-390)	0.87 (0.35-1.59)	-0.55 (-1.59-0.51)
Switzerland	87 (31-172)	0.77 (0.28-1.51)	113 (42-221)	0.56 (0.21-1.09)	-0.74 (-1.62-0.15)
Syrian Arab Republic	83 (33-145)	1.73 (0.7-3.06)	252 (105-448)	2.06 (0.87-3.75)	2.04 (0.87-3.23)
Taiwan (Province of China)	122 (47-224)	0.82 (0.29-1.52)	392 (152-748)	0.91 (0.36-1.73)	1.79 (1.38-2.2)
Tajikistan	20 (8-37)	0.83 (0.33-1.55)	35 (13-69)	0.85 (0.32-1.74)	-0.14 (-1.41-1.14)
Thailand	189 (71-360)	0.72 (0.28-1.44)	790 (276-1523)	0.73 (0.26-1.42)	2.12 (1.51-2.73)
Timor-Leste	0 (0-1)	0.16 (0.06-0.32)	1 (0-3)	0.17 (0.06-0.35)	1.52 (0.23-2.83)
Togo	2 (1-4)	0.18 (0.06-0.35)	6 (2-12)	0.22 (0.08-0.43)	1.04 (-0.62-2.73)
Tokelau	0 (0-0)	0.6 (0.22-1.15)	0 (0-0)	0.74 (0.29-1.37)	1.23 (1.04-1.42)
Tonga	1 (0-1)	0.98 (0.39-1.78)	1 (0-2)	1.09 (0.44-2.01)	0.86 (0.24-1.47)
Trinidad and Tobago	14 (5-25)	1.7 (0.67-3.17)	39 (16-69)	1.99 (0.82-3.47)	1.78 (1.46-2.11)
Tunisia	43 (16-82)	1.06 (0.39-2.07)	140 (55-259)	1.15 (0.45-2.15)	1.45 (0.87-2.04)
Turkey	488 (199-852)	1.61 (0.65-2.84)	1521 (618-2812)	1.69 (0.69-3.12)	1.29 (0.79-1.8)
Turkmenistan	15 (6-28)	1.03 (0.38-1.88)	35 (14-66)	1.15 (0.43-2.18)	1.17 (0.1-2.25)
Tuvalu	0 (0-0)	0.66 (0.25-1.25)	0 (0-0)	0.74 (0.29-1.35)	0.64 (0.22-1.06)
Uganda	11 (4-22)	0.2 (0.07-0.39)	28 (10-54)	0.22 (0.08-0.44)	0.08 (-1.62-1.81)
Ukraine	572 (210-1099)	0.84 (0.31-1.59)	690 (247-1404)	0.84 (0.3-1.67)	0.78 (0.18-1.38)
United Arab Emirates	8 (3-15)	1.99 (0.76-3.67)	103 (38-195)	2.1 (0.75-4.03)	1.15 (-0.79-3.14)
United Kingdom	3120 (1242-5449)	3.3 (1.33-5.82)	2808 (1101-4996)	2.06 (0.8-3.66)	-1.67 (-2.45--0.88)
United Republic of Tanzania	5 (2-10)	0.06 (0.02-0.11)	17 (6-33)	0.07 (0.03-0.14)	0.89 (-0.46-2.25)
United States of America	2344 (841-4466)	0.69 (0.25-1.3)	3917 (1477-7115)	0.63 (0.24-1.13)	-0.38 (-1.04-0.29)
United States Virgin Islands	1 (0-1)	0.78 (0.3-1.46)	2 (1-3)	0.81 (0.3-1.55)	2.12 (1.58-2.65)
Uruguay	13 (5-27)	0.34 (0.12-0.68)	15 (5-29)	0.27 (0.1-0.49)	-0.64 (-1.15--0.13)
Uzbekistan	51 (19-106)	0.48 (0.17-1.01)	100 (38-202)	0.5 (0.18-1)	0.3 (-0.67-1.28)
Vanuatu	0 (0-0)	0.19 (0.07-0.4)	0 (0-1)	0.21 (0.07-0.41)	0.59 (-0.84-2.04)
Venezuela (Bolivarian Republic of)	37 (14-74)	0.43 (0.15-0.88)	126 (46-240)	0.44 (0.16-0.85)	1.33 (0.67-1.99)
Viet Nam	86 (31-173)	0.23 (0.08-0.45)	271 (102-514)	0.29 (0.11-0.56)	1.95 (1.36-2.54)
Yemen	64 (26-116)	1.5 (0.58-2.7)	212 (83-381)	1.65 (0.63-3)	0.71 (-0.77-2.2)
Zambia	6 (3-13)	0.26 (0.09-0.51)	17 (6-33)	0.28 (0.11-0.56)	0.29 (-1.33-1.94)
Zimbabwe	13 (5-24)	0.41 (0.15-0.76)	23 (9-44)	0.45 (0.17-0.86)	0.25 (-1.26-1.78)
Abbreviations:EAPC: Estimated Annual Percentage Change; UI: Uncertainty Interval; CI: Confidence Interval
Appendix Table 8 YLLs of IHD due to insufficient physical activity in middle-aged and elderly populations by countries from 1990 to 2021: Age-standardized rates and case numbers.
	Rate Per 100 000(95%UI)
	1990		2021
location name	Num 95%UI	ASR 95%UI	Num 95%UI	ASR 95%UI	EAPC 95%CI
Afghanistan	13956 (5601-23526)	209.13 (84.75-355.06)	16319 (7019-27876)	173.7 (73.85-300.25)	-2.08 (-3.34--0.81)
Albania	785 (311-1382)	47.52 (18.04-84.35)	1881 (728-3449)	45.43 (17.59-84.03)	2.32 (1.75-2.88)
Algeria	15412 (6131-25938)	164.99 (64.81-289.48)	32645 (12998-55055)	112.38 (40.64-191.17)	-0.51 (-1.49-0.47)
American Samoa	40 (18-64)	156.33 (69.39-250)	88 (39-149)	171.98 (77.4-290.5)	1.6 (1.03-2.17)
Andorra	14 (5-27)	28.08 (10.61-54.96)	23 (9-47)	13.62 (5.44-26.96)	-0.9 (-1.48--0.31)
Angola	807 (328-1498)	25.91 (10.17-46.99)	2396 (934-4544)	26.33 (10.31-51.77)	-0.29 (-1.99-1.45)
Antigua and Barbuda	22 (8-40)	39.09 (15.31-69.96)	20 (8-36)	21.81 (8.1-39.57)	-2.07 (-2.38--1.76)
Argentina	6062 (2615-11182)	20.73 (8.87-39.79)	4654 (1755-9131)	8.06 (3.05-15.54)	-2.05 (-2.31--1.78)
Armenia	1827 (732-3130)	82.62 (32.76-140.6)	2498 (982-4551)	57.53 (22.81-103.26)	-0.32 (-0.77-0.13)
Australia	15551 (6467-27283)	81.4 (33.37-142.46)	9129 (3779-16845)	18.44 (8.08-32.29)	-4.26 (-4.84--3.67)
Austria	7203 (2743-12750)	57.01 (22.13-100.28)	4806 (1642-9675)	20.96 (7.53-41.2)	-2.87 (-3.81--1.92)
Azerbaijan	3979 (1519-6817)	98.91 (37.81-171.46)	6496 (2641-11793)	88.78 (35-162.87)	0.3 (-0.38-0.97)
Bahamas	60 (27-101)	41.33 (18.43-70.98)	91 (37-160)	24.39 (9.5-42.96)	-0.91 (-1.45--0.37)
Bahrain	323 (136-528)	243.69 (96.38-408.88)	552 (230-892)	90.34 (37-150.99)	-3.51 (-5.16--1.83)
Bangladesh	13229 (5536-24015)	28.9 (11.89-51.89)	34293 (14050-56810)	25.82 (10.61-43.43)	1.2 (0.19-2.23)
Barbados	205 (85-336)	70.06 (29.47-114.99)	188 (79-332)	36.24 (15.33-64.16)	-1.55 (-2.03--1.07)
Belarus	12159 (4732-21046)	99.68 (37.91-172.24)	17263 (7253-32012)	104.35 (43.55-189.57)	0.54 (-0.03-1.12)
Belgium	8343 (3023-15068)	52.16 (19.26-94.93)	3754 (1611-7144)	13.07 (5.72-24.07)	-3.83 (-4.76--2.89)
Belize	33 (14-56)	35.98 (15.39-61.93)	55 (22-95)	20.08 (7.67-35.21)	-2.06 (-2.96--1.15)
Benin	105 (41-208)	6.08 (2.28-11.88)	288 (103-566)	7.15 (2.47-15)	0.32 (-1.24-1.91)
Bermuda	40 (17-68)	70.64 (28.77-125.05)	27 (10-48)	17.61 (7.13-31.3)	-3.19 (-3.82--2.55)
Bhutan	356 (145-596)	144.99 (57.15-243.01)	775 (323-1308)	129.82 (53.82-220.44)	0.66 (-0.14-1.47)
Bolivia (Plurinational State of)	760 (254-1424)	28.79 (9.55-53.59)	1324 (476-2563)	17.4 (6-32.57)	-0.75 (-1.67-0.18)
Bosnia and Herzegovina	1968 (844-3382)	56.88 (23.85-100.77)	2708 (1049-4955)	41.98 (16.53-76.09)	0.13 (-0.43-0.69)
Botswana	265 (99-461)	56.21 (21.91-99.58)	564 (220-965)	45.04 (17.52-79.03)	-0.05 (-1.25-1.16)
Brazil	54215 (24469-86688)	70.94 (30.55-113.56)	86834 (35075-143199)	35.23 (14.32-58.13)	-0.9 (-1.41--0.38)
Brunei Darussalam	47 (20-79)	49.63 (20.05-87.7)	85 (36-148)	28.65 (10.85-54.29)	-0.53 (-1.68-0.63)
Bulgaria	8433 (3276-14241)	95.6 (34.59-164.22)	7580 (3008-13203)	53.06 (21.02-92.83)	-1.48 (-2.17--0.78)
Burkina Faso	522 (202-1011)	13.66 (5.22-25.78)	1266 (439-2382)	16.12 (5.5-31.04)	0.57 (-0.8-1.96)
Burundi	273 (104-504)	12.91 (4.93-24.29)	404 (153-742)	9.62 (3.81-18.73)	-1.91 (-3.37--0.42)
Cabo Verde	22 (8-41)	9.47 (3.5-17.12)	69 (25-136)	16.49 (6.02-32.53)	1.63 (1.06-2.2)
Cambodia	334 (128-610)	9.82 (3.39-18.57)	814 (272-1577)	9.19 (3.01-18.37)	0.35 (-0.94-1.65)
Cameroon	698 (258-1325)	18.32 (6.52-34.55)	2572 (978-4901)	24.52 (9.06-46.97)	0.87 (-0.63-2.38)
Canada	6451 (2122-13749)	20.33 (6.63-44.09)	5393 (1648-10930)	6.54 (2.13-12.86)	-2.85 (-3.54--2.16)
Central African Republic	257 (94-480)	26.36 (9.94-49.3)	441 (168-908)	23.95 (8.42-48.67)	-0.59 (-2.11-0.95)
Chad	412 (150-756)	15.85 (5.91-29.1)	915 (337-1678)	17.96 (6.75-32.51)	-0.28 (-1.72-1.18)
Chile	1588 (619-3098)	17.85 (6.69-35.94)	1489 (614-2833)	5.72 (2.37-10.81)	-2.38 (-2.69--2.06)
China	232559 (101053-387568)	39.94 (16.4-69.6)	807832 (356503-1435459)	45.05 (19.29-81.81)	2.33 (1.74-2.92)
Colombia	7959 (3213-13013)	46.3 (17.82-76.52)	15612 (6793-25258)	27.89 (12.17-45.06)	-0.22 (-0.81-0.37)
Comoros	15 (6-26)	8.4 (3.42-15.3)	38 (14-75)	8.44 (3.29-16.71)	0.62 (-0.43-1.68)
Congo	280 (114-502)	28.73 (11.09-51.67)	595 (232-1059)	24.34 (8.96-45.86)	-0.69 (-1.95-0.58)
Cook Islands	6 (3-10)	48.43 (20.42-82.24)	8 (3-14)	31.9 (13.22-56.18)	-0.02 (-0.36-0.33)
Costa Rica	326 (127-593)	19.85 (7.66-37.29)	508 (204-919)	9.09 (3.65-16.43)	-1.27 (-1.79--0.75)
C么te d'Ivoire	706 (261-1252)	21.44 (7.88-38.78)	2218 (896-4037)	23.35 (9.06-44.72)	0.68 (-0.95-2.34)
Croatia	5293 (2160-8878)	104.68 (41.24-178.01)	4970 (1979-9011)	49.07 (19.83-89.04)	-1.01 (-1.71--0.3)
Cuba	6086 (2256-10754)	62.29 (23.73-110.69)	6356 (2375-11449)	30.64 (11.51-56.89)	-1.4 (-1.88--0.91)
Cyprus	488 (190-874)	90.62 (32.56-168.79)	469 (165-859)	27.17 (9.25-50.52)	-3.32 (-3.6--3.04)
Czechia	15143 (5688-24757)	110.52 (41.32-182.62)	12177 (5194-21795)	51.27 (21.84-90.93)	-1.38 (-2.07--0.67)
Democratic People's Republic of Korea	4450 (1694-8250)	36.77 (14.03-72.49)	11300 (4329-21361)	38.99 (14.45-75.03)	1.24 (0.76-1.72)
Democratic Republic of the Congo	4727 (1974-8498)	40.49 (15.84-71.98)	9296 (3660-16782)	34.53 (13.67-64.09)	-0.86 (-2.46-0.76)
Denmark	5839 (2422-10382)	66.5 (27.39-115.44)	1539 (579-2916)	11.34 (4.31-21.02)	-5.76 (-6.62--4.9)
Djibouti	9 (3-17)	8 (3.05-15.83)	53 (20-100)	10.26 (3.52-19.21)	1.51 (-0.04-3.09)
Dominica	20 (7-37)	34.3 (12.65-65.41)	16 (6-30)	20.88 (8.11-40.29)	-1.25 (-1.47--1.03)
Dominican Republic	1354 (577-2313)	41.79 (17.13-73.38)	4145 (1730-7193)	42.11 (17.64-73.63)	1.71 (1.08-2.34)
Ecuador	541 (217-970)	10.86 (4.32-20.43)	1341 (489-2665)	8.58 (3.08-17.21)	0.09 (-0.63-0.82)
Egypt	46009 (20328-71598)	194.47 (84.93-310.47)	84322 (36738-141735)	160.45 (66.49-278.47)	-0.23 (-1.31-0.85)
El Salvador	572 (224-996)	19.94 (7.57-35.02)	1080 (365-2155)	16.43 (5.59-32.01)	0.44 (-0.05-0.93)
Equatorial Guinea	48 (19-88)	29.34 (11.28-55.45)	118 (46-234)	29.54 (10.9-58.21)	-0.65 (-2.32-1.04)
Eritrea	41 (15-80)	4.21 (1.43-8.79)	109 (43-209)	4.51 (1.69-8.77)	0.76 (-0.83-2.39)
Estonia	2098 (850-3788)	108.05 (42.49-196.07)	924 (354-1689)	26.86 (10.5-47.57)	-3.58 (-4.38--2.77)
Eswatini	65 (27-114)	27.14 (11.05-46.63)	170 (63-328)	35.47 (13.54-67.68)	1.88 (0.35-3.43)
Ethiopia	2182 (880-3856)	11.44 (4.46-20.66)	3369 (1291-6051)	8.12 (3.08-15.08)	-1.25 (-2.65-0.18)
Fiji	370 (163-626)	94.44 (40.26-156.94)	670 (276-1199)	86.67 (37.04-153.87)	0.44 (-0.18-1.07)
Finland	5273 (2010-9075)	71.87 (27.49-122.58)	3628 (1313-6873)	22.85 (8.79-41.27)	-2.67 (-3.61--1.72)
France	29283 (11639-53190)	32.54 (12.94-58.16)	19280 (7206-34985)	10.33 (4.13-18.69)	-2.98 (-3.92--2.02)
Gabon	58 (21-113)	12.02 (4.08-24.23)	90 (33-168)	11.36 (4.1-22.99)	-0.63 (-1.72-0.48)
Gambia	48 (18-91)	16.62 (6-32.91)	184 (73-331)	21.64 (8.26-40.39)	1.07 (-0.4-2.55)
Georgia	6064 (2436-10135)	109.3 (43.73-184)	2399 (925-4217)	36.59 (14.32-64.3)	-3.03 (-3.68--2.37)
Germany	74042 (28342-137154)	54.44 (20.84-98.84)	37696 (12837-75231)	15.33 (5.56-29.33)	-3.45 (-4.47--2.42)
Ghana	2037 (795-3594)	38.03 (14.92-66.72)	3248 (1355-5612)	23.41 (9.52-41.14)	-2.01 (-3.35--0.64)
Greece	5325 (2124-9682)	36.2 (14.29-66.2)	5548 (1955-10536)	17.63 (6.74-31.8)	-1.26 (-2.22--0.29)
Greenland	11 (4-22)	48.4 (18.04-100.95)	9 (3-15)	16.42 (6.21-29.56)	-2.38 (-3.14--1.61)
Grenada	30 (11-58)	39.9 (15.44-76.05)	25 (10-44)	25.89 (9.81-46.87)	-1.52 (-1.99--1.05)
Guam	24 (10-41)	42.03 (16.49-78.2)	50 (20-85)	23.52 (9.82-39.87)	0.5 (-0.13-1.14)
Guatemala	326 (133-601)	13.44 (4.96-28.26)	823 (303-1692)	9.14 (3.16-19.75)	0.04 (-1.47-1.57)
Guinea	316 (124-602)	10.66 (4.09-21.15)	567 (218-1082)	11.76 (4.41-22.69)	0.03 (-1.06-1.12)
Guinea-Bissau	123 (47-232)	35.1 (13.58-67.21)	231 (88-417)	38.34 (14.77-70.36)	0.06 (-1.5-1.65)
Guyana	234 (89-405)	68.24 (25.88-118.95)	263 (100-470)	45.79 (17.32-80.8)	-0.19 (-1.04-0.67)
Haiti	2403 (916-4122)	87.47 (32.12-155.37)	4248 (1645-8018)	68.57 (26.34-128.9)	-0.45 (-1.53-0.64)
Honduras	325 (115-604)	18.37 (6.45-34.06)	1510 (603-2838)	28.26 (11.21-57.19)	2.02 (0.85-3.2)
Hungary	11579 (4634-20259)	83.96 (33.36-149.22)	11964 (4537-20949)	54.69 (20.88-95.9)	-0.44 (-1.19-0.31)
Iceland	155 (62-288)	51.07 (20.81-93.53)	118 (47-223)	17.55 (7.17-32.27)	-2.72 (-3.25--2.18)
India	324468 (141388-513384)	78.26 (33.37-124.86)	831610 (384567-1333279)	77.38 (34.46-126.69)	0.62 (-0.11-1.37)
Indonesia	104063 (46219-165970)	122.37 (54.47-198.57)	322396 (141063-529618)	163.01 (72.32-264.99)	1.64 (0.83-2.46)
Iran (Islamic Republic of)	29235 (11501-47511)	129.97 (54.6-216.32)	49898 (22086-80213)	69.38 (31.3-113.98)	-0.97 (-1.8--0.14)
Iraq	14978 (5848-24276)	188.4 (74.85-309.52)	37058 (15922-62032)	167.56 (69.12-272.98)	-0.43 (-1.47-0.63)
Ireland	4063 (1656-7111)	100.85 (40.59-175.64)	1905 (748-3561)	22.43 (8.91-41.51)	-4.39 (-4.79--3.99)
Israel	2484 (970-4328)	53.04 (21.45-94.14)	1371 (472-2702)	9.86 (3.49-19.19)	-5.26 (-5.54--4.97)
Italy	43807 (17610-75699)	49.24 (19.79-85.01)	35237 (13522-63928)	18.47 (7.46-32)	-2.25 (-3.35--1.13)
Jamaica	721 (295-1215)	39.59 (16.26-66.15)	939 (408-1653)	29.32 (12.86-50.26)	-0.07 (-0.44-0.31)
Japan	40859 (16298-68707)	25.41 (10.16-44.4)	39480 (15093-71382)	10.56 (4.59-17.77)	-1.39 (-2.37--0.4)
Jordan	1172 (481-2103)	100.28 (40.5-178.86)	2912 (1145-4837)	46.81 (17.65-79.64)	-2.45 (-3.78--1.1)
Kazakhstan	8235 (3045-14982)	73.64 (26.02-137.64)	8549 (3443-15824)	59.35 (23.77-115.07)	-1.73 (-2.3--1.14)
Kenya	721 (298-1271)	9.31 (3.87-17.11)	3065 (1201-5403)	14.53 (5.49-25.73)	2.29 (0.88-3.72)
Kiribati	53 (22-89)	131.44 (56.23-224.37)	106 (42-188)	131.95 (52.18-238.45)	0.43 (-0.33-1.19)
Kuwait	1386 (640-2151)	203.67 (91.23-321.98)	3016 (1356-4837)	86.76 (36.57-141.83)	-1.92 (-2.78--1.06)
Kyrgyzstan	1890 (764-3230)	74.17 (29.7-128.73)	2739 (1154-4866)	79.3 (32.77-140.26)	0.34 (-0.54-1.22)
Lao People's Democratic Republic	469 (181-841)	25.85 (9.76-48.73)	670 (260-1215)	17.31 (6.31-33.37)	-1.31 (-2.42--0.18)
Latvia	3036 (1176-5227)	86.35 (34-149.57)	1836 (669-3404)	40.51 (15.27-73.69)	-1.72 (-2.52--0.9)
Lebanon	2619 (1107-4424)	127.7 (53.49-215.31)	2904 (1200-5402)	45.52 (19-83.18)	-2.53 (-2.91--2.16)
Lesotho	55 (18-104)	8.83 (2.63-16.88)	104 (39-198)	14.95 (5.21-29.43)	2.24 (0.9-3.6)
Liberia	442 (190-793)	40.31 (17.51-72.5)	939 (394-1662)	45.92 (18.33-81.84)	-0.23 (-1.42-0.98)
Libya	1816 (775-3051)	100.06 (42.05-169.18)	5479 (2320-9348)	109.22 (45.67-186.85)	1.52 (0.62-2.43)
Lithuania	6061 (2507-10626)	136.33 (55.56-240.27)	5580 (2152-10202)	80.76 (32.47-146.34)	-0.34 (-1.11-0.42)
Luxembourg	262 (99-470)	48.55 (18.49-88.39)	164 (60-322)	13.48 (5.18-25.57)	-3.79 (-4.43--3.14)
Madagascar	397 (146-748)	8.65 (3.23-16.44)	1036 (446-2011)	10.87 (4.48-20.6)	0.09 (-1.41-1.61)
Malawi	232 (95-426)	6.52 (2.64-12.06)	559 (213-1050)	8.1 (3.11-15.31)	0.34 (-1.08-1.77)
Malaysia	5794 (2343-10275)	66.79 (25.96-118.82)	16934 (7419-27889)	62.15 (26.24-103.4)	0.8 (0-1.6)
Maldives	232 (106-364)	241.44 (109.16-379.07)	264 (109-427)	83.27 (34.72-137.78)	-3.35 (-4.29--2.41)
Mali	732 (319-1337)	20.64 (8.78-37.95)	1515 (603-2904)	19.24 (7.73-36.59)	-0.48 (-1.83-0.9)
Malta	399 (168-657)	97.85 (40.97-163.16)	377 (150-698)	34.91 (13.88-64.61)	-2.15 (-2.84--1.45)
Marshall Islands	66 (28-105)	371.72 (158.72-597.97)	164 (75-270)	383.4 (171.79-644.39)	1.22 (0.31-2.14)
Mauritania	748 (294-1272)	78.06 (30.06-134.74)	1284 (515-2388)	62 (24.12-117.23)	-0.98 (-2.04-0.1)
Mauritius	307 (131-532)	48.44 (20.12-85.88)	366 (152-641)	21.03 (8.66-38.14)	-1.88 (-2.35--1.41)
Mexico	8124 (2922-13579)	23.05 (7.94-40.45)	25068 (10358-42745)	21.53 (8.8-37.92)	0.8 (-0.12-1.73)
Micronesia (Federated States of)	196 (84-317)	389.67 (165.84-629.8)	312 (131-529)	371.42 (156.61-610.38)	0.83 (0.09-1.58)
Monaco	26 (10-51)	32.34 (12.5-62.46)	18 (7-36)	15.52 (6.1-29.7)	-2.31 (-3.71--0.89)
Mongolia	337 (131-600)	39.31 (15.42-74.16)	418 (176-767)	26.48 (10.63-50.55)	-1.59 (-2.87--0.29)
Montenegro	275 (110-478)	47.43 (18.82-82.63)	574 (230-990)	66.27 (26.1-115.86)	1.98 (1.63-2.34)
Morocco	24833 (10998-41643)	182.77 (80.97-310.61)	52527 (21846-86801)	164.4 (66.12-275.13)	0.39 (-0.22-1)
Mozambique	185 (72-349)	3.82 (1.46-7.41)	472 (183-936)	5.33 (1.93-10.57)	1.12 (-0.43-2.69)
Myanmar	2708 (1033-5125)	13.1 (4.94-24.46)	4165 (1656-7866)	9.67 (3.62-19.08)	-0.45 (-1.15-0.25)
Namibia	200 (85-349)	36.85 (14.77-64.4)	448 (181-812)	38.17 (14.56-68.11)	0.26 (-0.95-1.49)
Nauru	7 (3-13)	138.4 (52.02-247.45)	10 (4-18)	161.02 (66.3-297.83)	0.54 (-0.32-1.42)
Nepal	2184 (849-3953)	26.48 (10.1-48.65)	5420 (2036-10321)	26.18 (9.47-49.35)	1.09 (0.12-2.06)
Netherlands	5700 (2170-10642)	27.72 (10.48-50.78)	2754 (1071-5560)	6.9 (2.75-13.66)	-4.16 (-4.92--3.39)
New Zealand	2723 (1161-4654)	69.6 (29.49-121.3)	2487 (1038-4632)	26.87 (11.33-49.41)	-2.37 (-2.89--1.85)
Nicaragua	193 (75-341)	14.26 (5.35-26.86)	587 (221-1128)	13.72 (4.85-27.79)	1.17 (0.13-2.21)
Niger	380 (134-746)	16.96 (5.89-33.45)	1260 (446-2544)	18.22 (6.47-35.71)	0.29 (-1.42-2.04)
Nigeria	12260 (5309-21064)	31.95 (13.44-56.98)	23881 (8975-41466)	30.87 (12.18-53.77)	-0.5 (-1.87-0.88)
Niue	2 (1-3)	80.2 (33.76-143.01)	2 (1-3)	74.75 (32.17-124.32)	0.02 (-0.23-0.27)
North Macedonia	997 (405-1743)	60.49 (24.59-105.2)	1490 (602-2670)	61.97 (23.33-116.59)	0.24 (-0.09-0.57)
Northern Mariana Islands	9 (4-16)	44.14 (16.56-76.04)	25 (11-42)	46.19 (20.09-76.69)	2.21 (1.41-3.02)
Norway	4447 (1650-7968)	59.58 (23.03-105.68)	1603 (585-2983)	13.63 (5.08-24.69)	-4.72 (-5.59--3.84)
Oman	1091 (492-1855)	178.65 (79.68-308.66)	1686 (708-2934)	103.93 (42.32-182.85)	-1.29 (-2.75-0.19)
Pakistan	27467 (11261-46031)	51.27 (20.62-86.06)	76861 (32904-130697)	67.34 (28.41-114.51)	0.77 (-0.27-1.81)
Palau	8 (3-14)	85.61 (36.16-154.3)	16 (7-28)	70.74 (28.93-122.16)	0.54 (0.17-0.91)
Palestine	1320 (556-2186)	166.3 (69.38-277.61)	2221 (943-3558)	104.76 (43.6-174.51)	-1.52 (-2.91--0.11)
Panama	235 (90-420)	17.09 (6.43-30.81)	410 (154-755)	9.05 (3.39-16.62)	-0.89 (-1.33--0.44)
Papua New Guinea	983 (400-1821)	49.17 (19.91-88.8)	2677 (1030-4815)	46.96 (16.98-83.68)	-0.01 (-0.98-0.97)
Paraguay	349 (123-647)	17.05 (6.18-31.8)	734 (290-1347)	13.32 (5.12-24.69)	0.19 (-0.52-0.91)
Peru	1710 (676-3244)	15.64 (6-30.23)	2964 (1188-5675)	8.84 (3.55-17.06)	-1.25 (-1.9--0.6)
Philippines	6297 (2496-10855)	27.01 (9.98-49.51)	18467 (7791-31741)	25.51 (10.76-44.27)	0.69 (-0.33-1.71)
Poland	42817 (17658-70174)	103.16 (42.45-168.94)	36141 (15769-61561)	46.21 (19.97-77.98)	-1.82 (-2.37--1.26)
Portugal	5669 (2241-9732)	44.35 (17.38-78.9)	4042 (1522-7606)	13.84 (5.22-24.87)	-3.01 (-3.88--2.13)
Puerto Rico	1780 (732-3120)	52.18 (21.05-92.43)	1113 (438-2079)	13.69 (5.59-24.95)	-3.37 (-4.03--2.71)
Qatar	200 (79-319)	232.35 (88.05-379.36)	517 (207-906)	72.84 (28.82-129.49)	-4.33 (-6.3--2.31)
Republic of Korea	4269 (1757-7222)	19.79 (7.38-36.97)	8035 (2951-15051)	8.89 (3.27-16.76)	-1.19 (-1.76--0.61)
Republic of Moldova	4067 (1562-7026)	122.5 (48.4-214.36)	4212 (1499-7452)	69.38 (25.21-122.35)	-1.13 (-1.57--0.68)
Romania	20706 (8880-33773)	87.76 (38.12-149.23)	20737 (8444-35766)	50.72 (20.84-85.93)	-1.09 (-1.69--0.49)
Russian Federation	159412 (65805-266605)	104.2 (42.4-177.66)	177020 (74271-300471)	71.99 (29.64-122.51)	-0.67 (-1.15--0.18)
Rwanda	304 (120-593)	12.29 (4.63-23.81)	409 (148-801)	8.03 (2.82-16.01)	-2.21 (-3.7--0.69)
Saint Kitts and Nevis	27 (11-46)	73.06 (31.62-124.41)	16 (6-29)	29.24 (10.43-52.89)	-2.75 (-3.08--2.41)
Saint Lucia	32 (12-58)	43.9 (15.72-83.08)	31 (12-57)	13.34 (4.97-24.98)	-3.08 (-3.69--2.46)
Saint Vincent and the Grenadines	38 (14-65)	57.83 (20.7-101.23)	38 (14-70)	29.7 (11.05-56.28)	-1.27 (-1.72--0.82)
Samoa	117 (51-191)	137.65 (59.26-229.3)	229 (96-382)	154.05 (62.98-256.67)	0.98 (0.28-1.69)
San Marino	9 (3-17)	23.87 (8.4-46.06)	7 (3-15)	7.66 (2.67-15.34)	-2.22 (-3.35--1.08)
Sao Tome and Principe	7 (3-12)	11.52 (4.73-22.16)	13 (5-24)	13.9 (5.15-25.79)	0.36 (-0.79-1.52)
Saudi Arabia	8213 (3570-13981)	155.83 (63.96-268.19)	26877 (10722-44279)	136.63 (54.73-225.18)	0.23 (-1.07-1.55)
Senegal	1053 (435-1862)	35.41 (15-60.42)	2381 (958-4364)	33.94 (13.26-63.17)	-0.06 (-1.26-1.15)
Serbia	7604 (2958-12773)	94.54 (37.38-166.33)	9690 (3425-17352)	55.39 (19.83-99.48)	-0.83 (-1.38--0.28)
Seychelles	21 (9-37)	37.89 (16.18-67.42)	27 (10-46)	27.6 (10.4-49.1)	-0.61 (-0.9--0.31)
Sierra Leone	521 (209-953)	28.18 (11.14-53.2)	1017 (419-1780)	30.51 (12.81-52.82)	0.04 (-1.17-1.27)
Singapore	865 (376-1512)	39.83 (16.92-70.23)	913 (382-1619)	10.68 (4.6-18.75)	-3.37 (-3.72--3.03)
Slovakia	4583 (1778-7723)	79.42 (30.3-133.7)	4713 (1730-8678)	49.6 (18.08-91.48)	-0.68 (-1.12--0.24)
Slovenia	925 (383-1612)	37.65 (15.56-65.98)	680 (238-1209)	12.45 (4.58-21.94)	-2.87 (-3.66--2.08)
Solomon Islands	177 (72-317)	123.8 (52.63-221.08)	453 (187-795)	122.66 (52.63-211.41)	0.38 (-0.68-1.44)
Somalia	161 (58-308)	7.86 (2.88-15.26)	435 (164-865)	8.54 (3.19-17.04)	0.1 (-1.72-1.95)
South Africa	12269 (5448-19810)	61.55 (26.73-102.45)	25354 (11396-40040)	60.73 (27.08-98.21)	0.2 (-0.52-0.91)
South Sudan	169 (65-316)	7.41 (2.76-14.42)	292 (107-556)	8.62 (3.04-16.61)	0.12 (-1.39-1.65)
Spain	18066 (7371-32791)	33.49 (13.9-61.16)	14234 (5508-26584)	11.7 (4.62-21.15)	-2.66 (-3.57--1.73)
Sri Lanka	1193 (461-2104)	12.33 (4.73-22.36)	2505 (908-4679)	9.74 (3.55-18.58)	0.76 (0.32-1.2)
Sudan	64057 (29755-100955)	642.33 (291.41-1019.59)	95023 (40525-164646)	430.34 (185.62-746.19)	-1.46 (-2.43--0.49)
Suriname	162 (70-283)	64.89 (27.36-114.59)	226 (96-386)	35.68 (15.12-61)	-0.99 (-1.43--0.54)
Sweden	7160 (2850-13219)	42.58 (17.14-76.93)	3021 (1121-5548)	11.55 (4.38-20.4)	-3.87 (-4.94--2.79)
Switzerland	5017 (1920-9266)	44.14 (17.15-79.73)	2677 (905-5327)	11.32 (4.06-21.6)	-3.9 (-4.88--2.92)
Syrian Arab Republic	10404 (4365-16802)	211.2 (89.93-342.35)	22425 (9846-39167)	194.86 (85.93-349.01)	0.62 (-0.6-1.86)
Taiwan (Province of China)	3528 (1587-5871)	25.68 (11.44-44.28)	5350 (2247-9169)	12.64 (5.41-21.4)	-0.56 (-1.03--0.09)
Tajikistan	1920 (761-3284)	81.27 (31.19-141.19)	2596 (1098-4758)	68.03 (28.44-129.15)	-1.12 (-2.43-0.21)
Thailand	6681 (2565-11649)	25.47 (9.55-45.61)	14828 (5605-27154)	13.73 (5.24-25.12)	-0.65 (-1.26--0.04)
Timor-Leste	31 (13-60)	13.19 (5.25-25.95)	102 (38-191)	13.78 (4.89-26.63)	1.29 (0.05-2.54)
Togo	136 (55-266)	13.73 (5.22-26.16)	421 (157-789)	14.59 (5.2-27.75)	0.36 (-1.3-2.04)
Tokelau	1 (0-2)	80.4 (31.08-143.43)	1 (0-2)	68.02 (25.45-120.47)	-0.07 (-0.26-0.12)
Tonga	27 (11-48)	48.4 (19.77-85.43)	39 (17-66)	48.03 (20.21-81.29)	0.62 (0.04-1.2)
Trinidad and Tobago	999 (429-1569)	128.4 (53.94-208.92)	1193 (517-2075)	61.02 (26.31-106.36)	-1.76 (-2.14--1.38)
Tunisia	2949 (1046-5199)	79.62 (27.81-145.53)	7128 (2733-12834)	61.58 (24.01-112.92)	0.25 (-0.41-0.91)
Turkey	29834 (11990-48828)	100.79 (39.78-166.75)	58146 (24760-100822)	68.52 (28.83-119.12)	0.09 (-0.46-0.65)
Turkmenistan	1664 (665-2865)	112.73 (45.36-196.27)	3076 (1129-5475)	100.99 (37.34-181.99)	-0.55 (-1.62-0.53)
Tuvalu	7 (3-12)	106.04 (41.71-181.96)	9 (3-16)	90.47 (33.6-151.76)	-0.27 (-0.61-0.07)
Uganda	420 (168-794)	7.63 (2.95-14.99)	997 (374-1885)	8.09 (2.86-15.83)	-0.73 (-2.45-1.03)
Ukraine	45103 (17495-80158)	69.97 (25.56-130.54)	65025 (22483-128092)	79.55 (27.55-155.61)	0.63 (0.02-1.25)
United Arab Emirates	611 (251-1067)	156.26 (65.19-279.04)	2258 (835-3893)	91.08 (33.11-166.4)	-0.9 (-3.21-1.47)
United Kingdom	188017 (80231-302127)	201.65 (86.78-322.52)	70781 (30190-113847)	50.79 (21.89-80.98)	-4.46 (-5.25--3.67)
United Republic of Tanzania	239 (91-457)	2.41 (0.89-4.71)	707 (271-1378)	3.06 (1.13-6.14)	0.42 (-0.89-1.75)
United States of America	164352 (63534-303708)	48.98 (19.37-90.23)	139807 (52455-237252)	22.32 (8.39-37.29)	-2.38 (-3.02--1.73)
United States Virgin Islands	38 (15-66)	61.36 (23.26-112.2)	43 (17-80)	24.85 (9.16-46.9)	-0.88 (-1.37--0.4)
Uruguay	1091 (431-2026)	28.15 (11.25-52.73)	681 (261-1279)	11.65 (4.63-20.75)	-2.37 (-2.9--1.83)
Uzbekistan	4578 (1800-8471)	44.37 (17.02-83.06)	8967 (3807-16533)	46.75 (18.2-87.54)	0.3 (-0.7-1.31)
Vanuatu	12 (5-22)	22.52 (9.18-41.81)	32 (13-57)	21.86 (8.23-39.06)	0.05 (-1.24-1.36)
Venezuela (Bolivarian Republic of)	2537 (1093-4375)	28.7 (11.94-50.86)	6721 (2533-12110)	23.39 (8.83-42.69)	0.23 (-0.45-0.92)
Viet Nam	3461 (1286-6660)	9.38 (3.48-18.38)	9848 (3710-18075)	10.91 (3.95-21.21)	1.99 (1.35-2.64)
Yemen	8782 (3575-15865)	196.5 (78.85-353.92)	20341 (8429-35357)	157.85 (62.55-278.67)	-0.64 (-2.07-0.81)
Zambia	253 (102-461)	9.88 (3.87-17.88)	856 (331-1538)	14.17 (5.25-26.07)	1.03 (-0.58-2.66)
Zimbabwe	538 (211-986)	18.74 (7.03-36)	1410 (543-2496)	27.86 (10.99-51.2)	2.09 (0.43-3.77)
Abbreviations:EAPC: Estimated Annual Percentage Change; UI: Uncertainty Interval; CI: Confidence Interval

## Sheet: Sheet1
Table 1 DALYs of IHD due to insufficient physical activity in middle-aged and elderly populations by Global, Sex, Age, SDI region from 1990 to 2021: Age-standardized rates and case numbers.
	1990		2021		1990-2021
location name	Number 95%UI	ASR 95%UI	Number 95%UI	ASR 95%UI	EAPC 95%CI
Global	2211838 (994931-3406072)	63.49 (28.24-99.92)	3812527 (1726040-5985591)	45.62 (20.68-71.84)	-0.37 (-0.72--0.03)
Female	1438953 (646043-2215065)	72.69 (32.55-112.58)	2361489 (1046160-3749396)	50.72 (22.49-80.4)	-1.24 (-1.28--1.2)
Male	772886 (339832-1196976)	48.56 (20.98-77.15)	1451038 (680569-2290024)	38.59 (18.08-60.95)	-0.85 (-0.92--0.77)
Age
40-44 years	43125 (21025-65940)	15.05 (7.34-23.02)	67745 (34306-104031)	13.54 (6.86-20.8)	-0.58 (-0.79--0.37)
45-49 years	70199 (33860-109256)	30.23 (14.58-47.05)	109554 (55891-169597)	23.14 (11.8-35.82)	-1.07 (-1.3--0.84)
50-54 years	105336 (52406-164607)	49.55 (24.65-77.44)	168187 (79896-262422)	37.8 (17.96-58.98)	-1.06 (-1.27--0.85)
55-59 years	164522 (73936-261116)	88.84 (39.92-140.99)	269723 (127687-436402)	68.16 (32.27-110.28)	-1.07 (-1.27--0.86)
60-64 years	238945 (104018-377623)	148.77 (64.76-235.12)	337520 (153450-540520)	105.46 (47.95-168.89)	-1.5 (-1.65--1.35)
65-69 years	275260 (123063-420441)	222.69 (99.56-340.14)	441402 (198089-691881)	160.02 (71.81-250.82)	-1.32 (-1.42--1.21)
70-74 years	282297 (115884-453002)	333.44 (136.88-535.08)	522152 (231587-855820)	253.67 (112.51-415.77)	-1.01 (-1.07--0.95)
75-79 years	327151 (144062-534495)	531.47 (234.04-868.31)	490057 (205044-830687)	371.58 (155.47-629.86)	-1.06 (-1.11--1.01)
80-84 years	343918 (144435-565491)	972.18 (408.29-1598.52)	600083 (260164-976006)	685.16 (297.05-1114.38)	-1.11 (-1.21--1.01)
85-89 years	197647 (82333-330402)	1307.96 (544.86-2186.49)	415331 (181072-682549)	908.39 (396.03-1492.83)	-1.17 (-1.23--1.1)
90-94 years	81698 (33367-135171)	1906.53 (778.66-3154.38)	230686 (98593-384157)	1289.51 (551.12-2147.41)	-1.3 (-1.37--1.23)
95+ years	27682 (11013-47856)	2719.05 (1081.7-4700.59)	90504 (37774-152736)	1660.53 (693.07-2802.33)	-1.73 (-1.84--1.63)
SDI
High-middle SDI	547262 (243636-835171)	65.69 (28.83-100.72)	937894 (408742-1515369)	48.4 (21.14-78.49)	-1.14 (-1.29--1)
High SDI	672289 (287731-1065608)	60.41 (26.08-95.92)	482852 (206160-773191)	20.96 (9.08-33.1)	-3.7 (-3.9--3.5)
Low-middle SDI	382103 (174525-579386)	67.88 (30.01-103.49)	855528 (394032-1325175)	64.7 (29.12-101.52)	-0.14 (-0.19--0.09)
Low SDI	70160 (31089-108785)	35.69 (15.35-55.39)	140981 (62765-220795)	32.32 (14.04-51.6)	-0.24 (-0.37--0.1)
Middle SDI	536712 (247463-826135)	60.63 (26.95-94.8)	1391433 (631784-2183120)	56.55 (25.57-88.98)	-0.22 (-0.26--0.19)
Abbreviations:EAPC: Estimated Annual Percentage Change; UI: Uncertainty Interval; CI: Confidence Interval; SDI: Sociodemographic Index
